# Supplementary material for: Metal ion-modulated self-assembly of pseudo-suit[3]anes using crown ether-based terpyridine metalloprisms
Source: Royal Society of Chemistry journal article supplement (doi:10.1039/c6cc07452a), 2016-01-01
Supplement: c6cc07452a1.pdf [file c6cc07452a1.pdf]

## Metal ion-modulated self-assembly of pseudo-suit[3]anes using crown ether-based terpyridine metalloprisms

Yun-Chi Wang, Yen-Peng Liang, Jhen-Yu Cai, Yun-Jui He, Yin-Hsuan Lee, and Yi-Tsu Chan\*

### Table of Contents

|                                                                                                                                   |     |
|-----------------------------------------------------------------------------------------------------------------------------------|-----|
| Materials and methods.....                                                                                                        | S2  |
| Synthesis of ligand <b>T</b> .....                                                                                                | S3  |
| <sup>1</sup> H and <sup>13</sup> C NMR spectra of ligand <b>T</b> .....                                                           | S4  |
| MALDI-TOF-MS spectrum of ligand <b>T</b> .....                                                                                    | S5  |
| Complexation reactions.....                                                                                                       | S5  |
| 2D NMR spectra of [Cd <sub>6</sub> <b>T</b> <sub>3</sub> ].....                                                                   | S7  |
| 2D NMR spectra of [Zn <sub>6</sub> <b>T</b> <sub>3</sub> ].....                                                                   | S8  |
| ESI-MS spectra of [Cd <sub>6</sub> <b>T</b> <sub>3</sub> ] and [Zn <sub>6</sub> <b>T</b> <sub>3</sub> ].....                      | S9  |
| ESI-TWIM-MS plot of [Zn <sub>6</sub> <b>T</b> <sub>3</sub> ].....                                                                 | S12 |
| Synthesis of <b>TriG</b> .....                                                                                                    | S13 |
| <sup>1</sup> H and <sup>13</sup> C NMR spectra of compounds <b>4</b> , <b>5</b> , <b>6</b> , <b>7</b> , and <b>TriG</b> .....     | S16 |
| ESI-MS spectrum of <b>TriG</b> .....                                                                                              | S21 |
| Molecular modeling of [Cd <sub>6</sub> <b>T</b> <sub>3</sub> ]⊃ <b>TriG</b> .....                                                 | S21 |
| Time-dependent <sup>1</sup> H NMR spectra of the inclusion process of [Cd <sub>6</sub> <b>T</b> <sub>3</sub> ]⊃ <b>TriG</b> ..... | S22 |
| 2D NMR spectra of [Cd <sub>6</sub> <b>T</b> <sub>3</sub> ]⊃ <b>TriG</b> .....                                                     | S22 |
| ESI-MS spectra of [Cd <sub>6</sub> <b>T</b> <sub>3</sub> ]⊃ <b>TriG</b> .....                                                     | S25 |
| Binding constant of [Cd <sub>6</sub> <b>T</b> <sub>3</sub> ]⊃ <b>TriG</b> .....                                                   | S26 |
| Decomplexation of [Cd <sub>6</sub> <b>T</b> <sub>3</sub> ]⊃ <b>TriG</b> .....                                                     | S26 |
| Time-dependent <sup>1</sup> H NMR spectra of the inclusion process of [Zn <sub>6</sub> <b>T</b> <sub>3</sub> ]⊃ <b>TriG</b> ..... | S27 |
| Synthesis and characterization of [Zn <sub>6</sub> <b>T</b> <sub>3</sub> ]⊃ <b>TriG</b> .....                                     | S28 |
| Inclusion and transmetalation study.....                                                                                          | S30 |
| Tandem mass spectrometry analysis.....                                                                                            | S34 |
| References.....                                                                                                                   | S34 |

**Materials and General Methods.** Unless otherwise noted, reagents and solvents were received from Alfa Aesar, Sigma-Aldrich and used without further purification. Column chromatography was conducted using silica gel (75-200  $\mu\text{m}$ ) from Fuji Silysia GS series and basic  $\text{Al}_2\text{O}_3$  (50-200  $\mu\text{m}$ ) from Acros.  $^1\text{H}$  and  $^{13}\text{C}$  NMR spectra were recorded at 25  $^\circ\text{C}$  on a Varian Mercury NMR 400 spectrometer, where chemical shifts ( $\delta$  in ppm) were determined with respect to the nondeuterated solvents as a reference. The transmission electron microscope (TEM) images were recorded on a Hitachi Model H-7650 microscope operated at 120 kV or a JEOL EX-1200 microscope operated at 80 kV. TEM samples were prepared by drop-casting a sample solution ( $\sim 10^{-8}$  M) onto a carbon-coated copper grid and dried *in vacuo* for 24 h.

**Mass Spectrometry and Ion-Mobility Experiments.** Mass spectrometry and traveling wave ion-mobility (TWIM) experiments were conducted on a Waters Synapt HDMS G2 with a LockSpray ESI source, using the same parameters in the literature.<sup>[1]</sup> Data were collected and analyzed by using MassLynx 4.1 and DriftScope 2.4 (Waters). The experimental collision cross-sections (CCSs) were obtained according to the literature procedure.<sup>[1]</sup> Matrix-assisted laser desorption/ionization coupled with time-of-flight detector (MALDI-TOF) mass spectrometry was conducted on a Bruker autoflex series spectrometer equipped with a nitrogen 337 nm laser. 1.0  $\mu\text{L}$  of 2,5-dihydroxybenzoic acid (DHB) matrix solution (10 mg/mL in  $\text{CH}_3\text{CN}$ ) was first deposited on a MALDI plate and air-dried. Aliquots of sample solution (1 mg/mL in  $\text{CHCl}_3$ ) were then added onto the matrix spots for measurements.

**Molecular Modeling.** Energy-minimized structures were obtained following the same settings in the literature.<sup>[2]</sup> Calculations were proceeded with Anneal and Geometry Optimization functions in Forcite module of Materials Studio version 7.0 program (Accelrys Software, Inc.). For each structure, 200 conformations after annealing were generated and converted to collision cross-sections using projection approximation (PA) and trajectory method (TM) in MOBCAL.<sup>[3]</sup>

## Synthesis of ligand **T**

4'-(4-Boronophenyl)-2,2':6',2''-terpyridine (**1**)<sup>[4]</sup> and 4,4',5,5'-tetrabromodibenzo[24]crown-8 (**2**)<sup>[5]</sup> were synthesized according to the literature procedures.

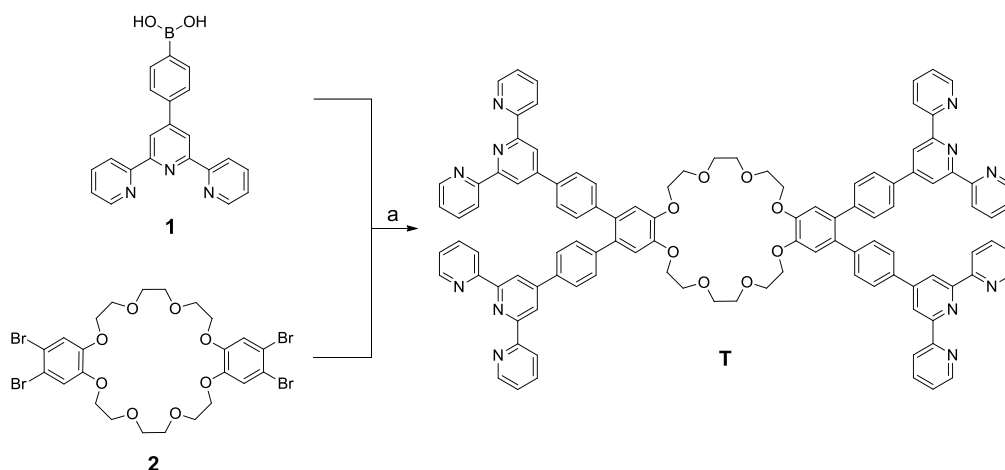

**Scheme S1.** Synthesis of ligand **T**. *Reagents and conditions:* (a) Pd(PPh<sub>3</sub>)<sub>4</sub>, Na<sub>2</sub>CO<sub>3</sub>, toluene/H<sub>2</sub>O/*t*-BuOH (3:3:1, v/v/v), reflux.

**4,4',5,5'-tetrakis[4-(4'-terpyridinyl)phenyl]dibenzo[24]crown-8 (T).** To a degassed two-neck flask containing **2** (100.3 mg, 131.3 μmol), **1** (460.5 mg, 1.3 mmol), and Na<sub>2</sub>CO<sub>3</sub> (138.0 mg, 1.3 mmol), a mixed solvent (70 mL) of toluene/H<sub>2</sub>O/*t*-BuOH (3:3:1, v/v/v) was added. After being purged with N<sub>2</sub> for 30 min, Pd(PPh<sub>3</sub>)<sub>4</sub> (58.3 mg, 50.5 μmol) was added into the mixture, which was then refluxed for 2 days under N<sub>2</sub>. After cooling to room temperature, the aqueous layer was extracted with CHCl<sub>3</sub>. The combined organic extract was dried over Na<sub>2</sub>SO<sub>4</sub> and then evaporated to dryness under reduce pressure. The residue was purified by flash column chromatography (basic Al<sub>2</sub>O<sub>3</sub>, CHCl<sub>3</sub>) and then recrystallized from MeOH to give **T** as a brown solid (180.2 mg, 0.11 mmol) in 82% yield. <sup>1</sup>H NMR (400 MHz, CDCl<sub>3</sub>): δ (ppm) 8.71 (s, 8H), 8.69–8.64 (m, 8H), 8.62 (d, *J* = 7.9 Hz, 8H), 7.83 (td, *J* = 7.7 and 1.8 Hz, 8H), 7.80–7.75 (m, 8H), 7.32–7.26 (m, 16H), 7.03 (s, 4H), 4.29 (t, *J* = 4.2 Hz, 8H), 3.99 (t, *J* = 4.3 Hz, 8H), and 3.90 (s, 8H). <sup>13</sup>C NMR (100 MHz, CDCl<sub>3</sub>): δ (ppm) 156.25, 155.80, 149.71, 149.04, 148.43, 142.05, 136.72, 136.30, 133.06, 130.43, 126.98, 123.65, 121.25, 118.73, 116.37, 71.37, 69.95, and 69.77. MALDI-TOF-MS: calcd. for C<sub>108</sub>H<sub>85</sub>N<sub>12</sub>O<sub>8</sub> [M+H]<sup>+</sup>: *m/z* = 1678.6647; found: 1678.6517 and calcd. for C<sub>108</sub>H<sub>84</sub>N<sub>12</sub>NaO<sub>8</sub> [M+Na]<sup>+</sup>: *m/z* = 1700.6466; found: 1700.6394.

# $^1\text{H}$ and $^{13}\text{C}$ NMR spectra of ligand **T**

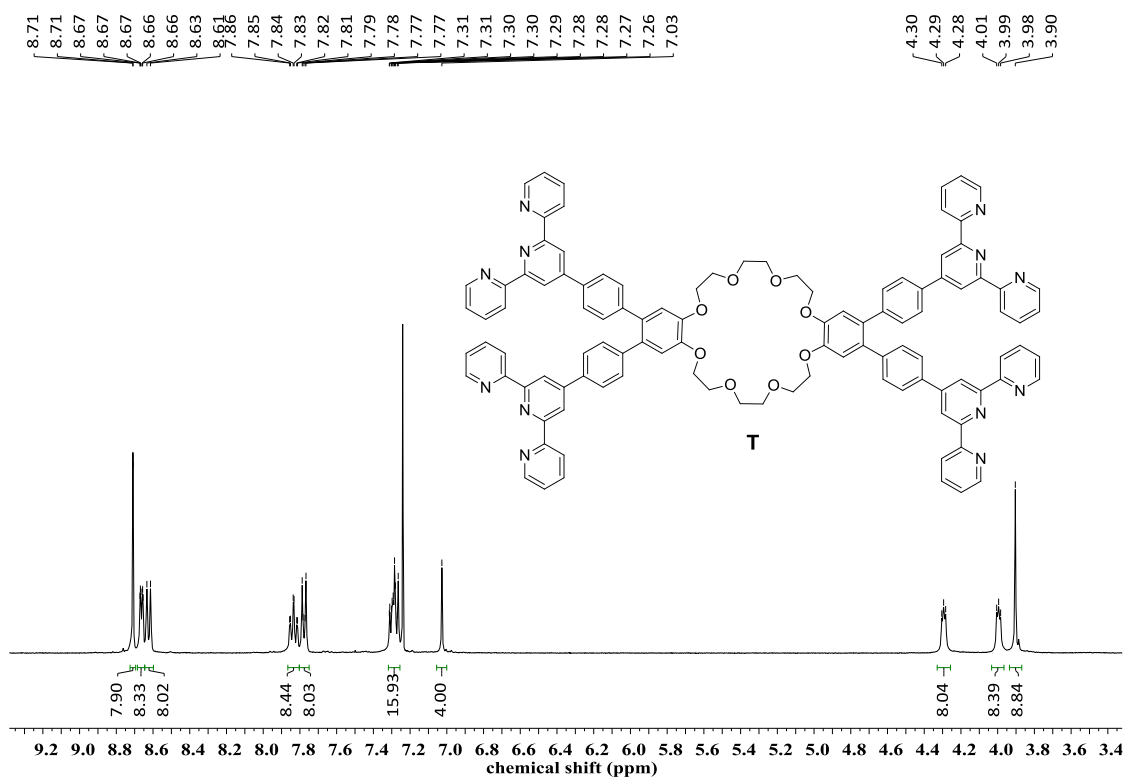

Fig. S1  $^1\text{H}$  NMR spectrum of **T** in CDCl<sub>3</sub>.

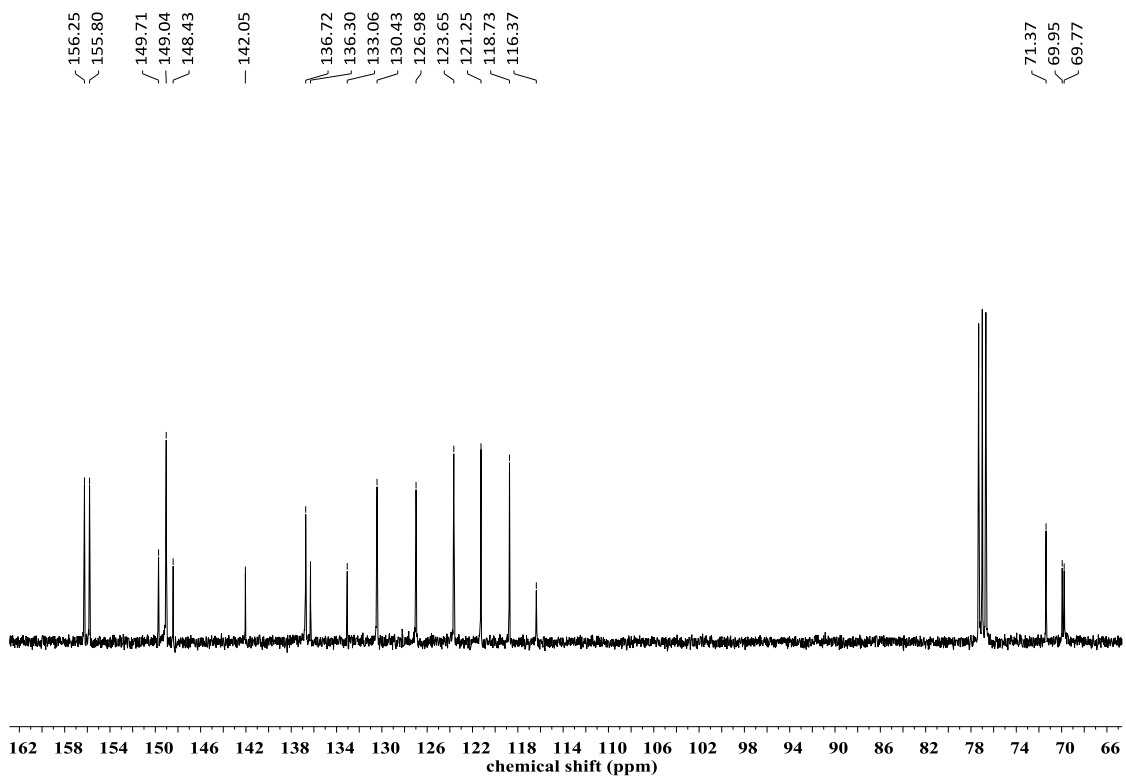

Fig. S2  $^{13}\text{C}$  NMR spectrum of **T** in CDCl<sub>3</sub>.

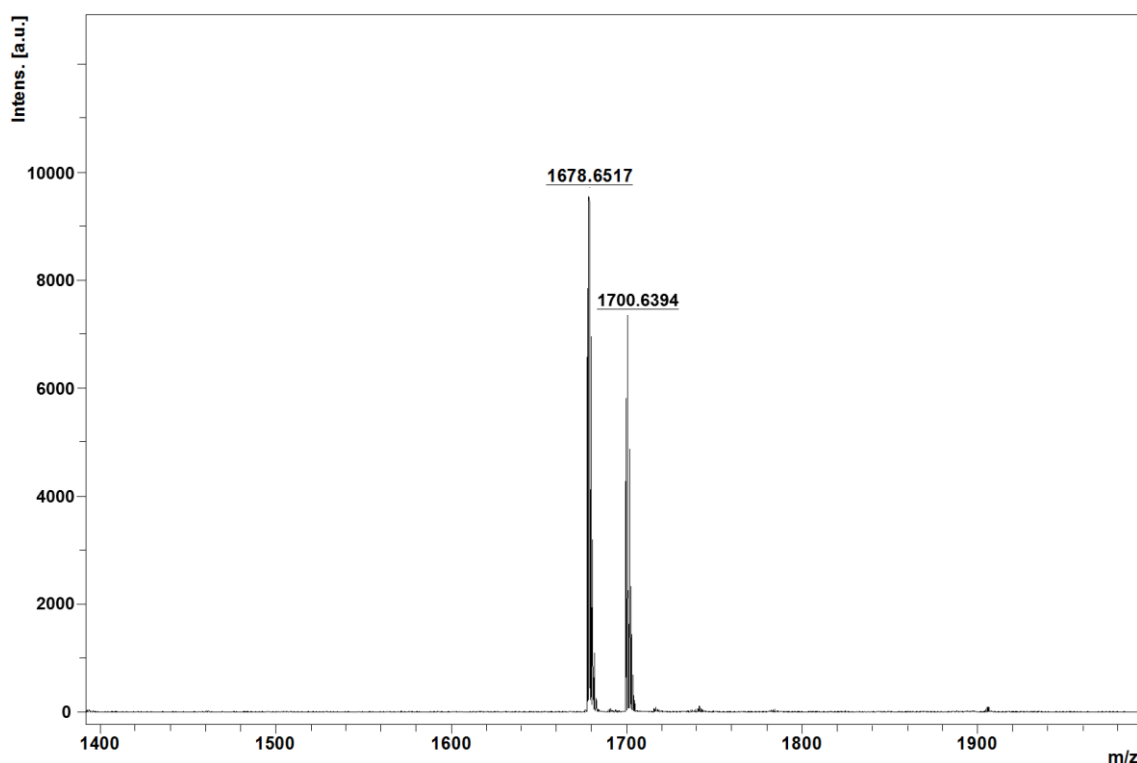

**Fig. S3** MALDI-TOF-MS spectrum of **T**.

### Complexation Reactions

**[Cd<sub>6</sub>T<sub>3</sub>].** To a stirred CHCl<sub>3</sub> solution (5 mL) of **T** (20.5 mg, 12.2 μmol), a MeOH solution (5 mL) of Cd(NO<sub>3</sub>)<sub>2</sub>·4H<sub>2</sub>O (7.7 mg, 24.9 μmol) was added. A small amount of MeNO<sub>2</sub> was added in order to improve the solubility. After the mixture was stirred for 30 min at 25 °C, an excess amount of NH<sub>4</sub>PF<sub>6</sub> (82.0 mg, 0.5 mmol) was added to precipitate the counterion-exchanged complex (PF<sub>6</sub><sup>-</sup>), and then the mixture was stirred for additional 30 min. The precipitate was filtered, washed with H<sub>2</sub>O, and dried *in vacuo* to give [Cd<sub>6</sub>T<sub>3</sub>] (29.1 mg, 3.9 μmol) in 95% yield. <sup>1</sup>H NMR (400 MHz, CD<sub>3</sub>CN): δ (ppm) 8.88 (s, 24H), 8.62 (d, *J* = 8.2 Hz, 24H), 8.08 (d, *J* = 8.4 Hz, 24H), 7.95 (d, *J* = 4.2 Hz, 24H), 7.81 (dt, *J* = 7.8 and 1.6 Hz, 24H), 7.55 (d, *J* = 8.3 Hz, 24H), 7.18 (s, 12H), 7.02 (dd, *J* = 7.4 and 5.8 Hz, 24H), 4.43 (t, *J* = 10.1 Hz, 12H), 4.27 (d, *J* = 9.5 Hz, 12H), 4.00–3.87 (m, 36H), and 3.72–3.67 (m, 12H). ESI-MS (*m/z*): 1717.0066 [M-4PF<sub>6</sub>]<sup>4+</sup> (calcd. *m/z* = 1717.0266), 1344.6158 [M-5PF<sub>6</sub>]<sup>5+</sup> (calcd. *m/z* = 1344.6284), 1096.3457 [M-6PF<sub>6</sub>]<sup>6+</sup> (calcd. *m/z* = 1096.3630), 919.0110 [M-7PF<sub>6</sub>]<sup>7+</sup> (calcd. *m/z* = 919.0306), 786.1445 [M-8PF<sub>6</sub>]<sup>8+</sup> (calcd. *m/z* = 786.0312), and 668.5806 [M-PF<sub>5</sub>-9PF<sub>6</sub>]<sup>9+</sup> (calcd. *m/z* = 668.5873).

**[Zn<sub>6</sub>T<sub>3</sub>].** To a stirred CHCl<sub>3</sub> solution (10 mL) of **T** (41.0 mg, 24.5 μmol), a MeOH solution (10 mL) of Zn(NO<sub>3</sub>)<sub>2</sub>·6H<sub>2</sub>O (15.1 mg, 49.9 μmol) was added. After the mixture was stirred for 30 min at 25 °C, an excess amount of NH<sub>4</sub>PF<sub>6</sub> (159.4 mg, 1.0 mmol) was added to precipitate the counterion-exchanged complex (PF<sub>6</sub><sup>-</sup>), which was filtered,

washed with H<sub>2</sub>O, and redissolved in MeCN (210 mL). After the solution was stirred at 70 °C for 3 days, the mixture was poured into Et<sub>2</sub>O to precipitate the complex, which was filtered, washed with H<sub>2</sub>O, and dried *in vacuo* to give [Zn<sub>6</sub>T<sub>3</sub>] (58.0 mg, 8.1 μmol) in 99% yield. <sup>1</sup>H NMR (400 MHz, CD<sub>3</sub>CN): δ (ppm) 8.92 (s, 24H), 8.55 (d, *J* = 8.1 Hz, 24H), 8.12 (d, *J* = 8.3 Hz, 24H), 7.69 (d, *J* = 4.6 Hz, 24H), 7.65 (dt, *J* = 7.8 and 1.5 Hz, 24H), 7.57 (d, *J* = 8.2 Hz, 24H), 7.21 (s, 12H), 6.83 (dd, *J* = 7.0 and 5.4 Hz, 24H), 4.45 (t, *J* = 8.4 Hz, 12H), 4.29 (d, *J* = 9.0 Hz, 12H), 4.00–3.86 (m, 36H), and 3.72–3.68 (m, 12H). ESI-MS (*m/z*): 1646.2517 [M-4PF<sub>6</sub>]<sup>4+</sup> (calcd. *m/z* = 1646.3130), 1288.0162 [M-5PF<sub>6</sub>]<sup>5+</sup> (calcd. *m/z* = 1288.0592), 1049.1753 [M-6PF<sub>6</sub>]<sup>6+</sup> (calcd. *m/z* = 1049.2206), 878.5874 [M-7PF<sub>6</sub>]<sup>7+</sup> (calcd. *m/z* = 878.6216), 750.6469 [M-8PF<sub>6</sub>]<sup>8+</sup> (calcd. *m/z* = 750.6744), and 637.1447 [M-PF<sub>5</sub>-9PF<sub>6</sub>]<sup>9+</sup> (calcd. *m/z* = 637.1625).

## 2D NMR spectra of $[\text{Cd}_6\text{T}_3]$

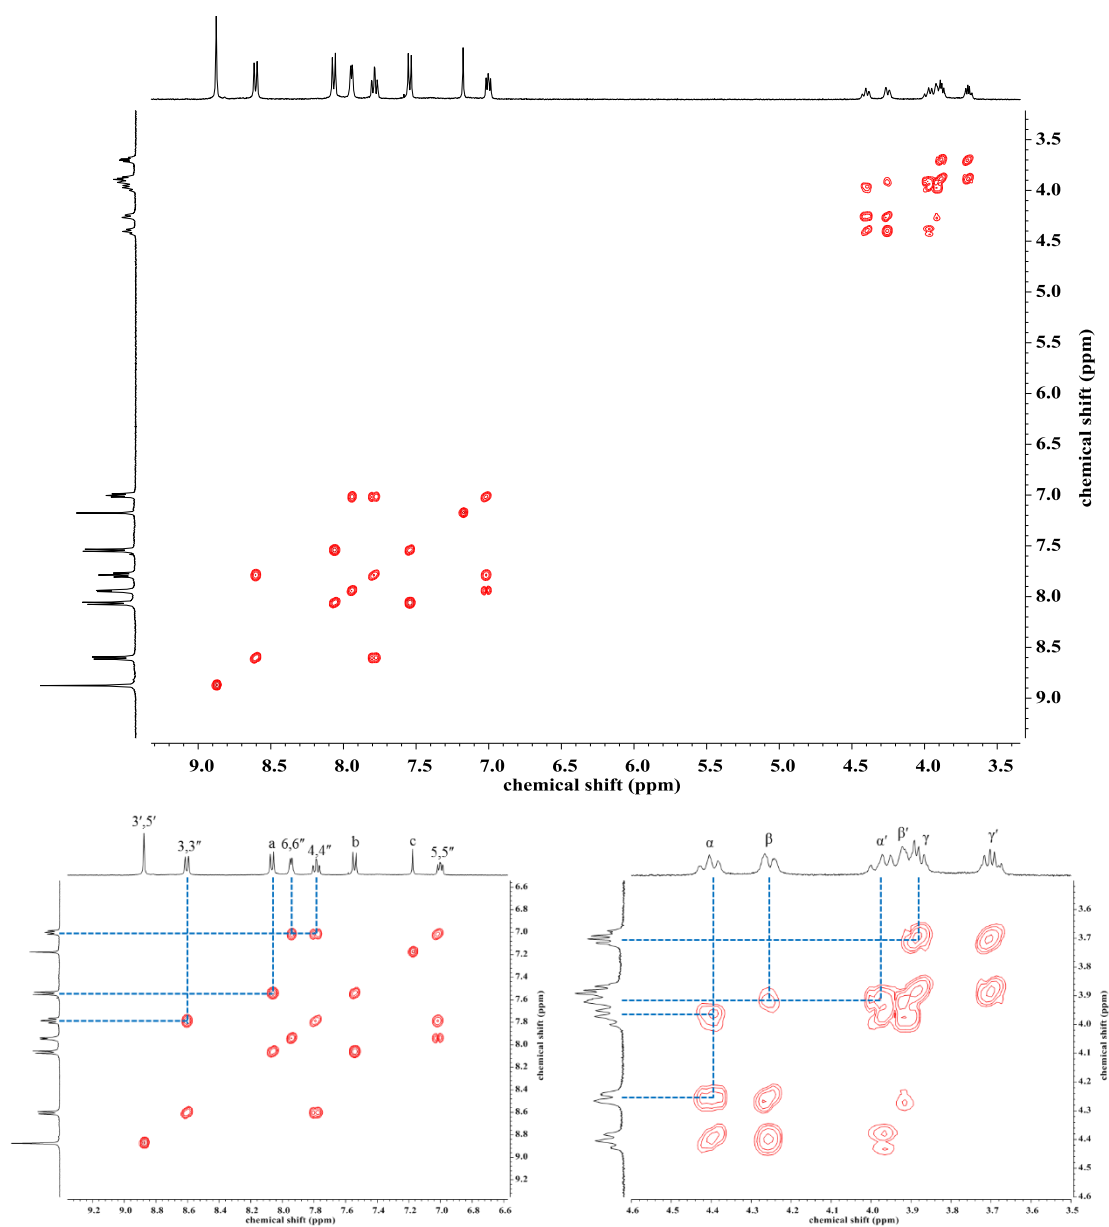

Fig. S4 COSY spectra of  $[\text{Cd}_6\text{T}_3]$  in  $\text{CD}_3\text{CN}$ .

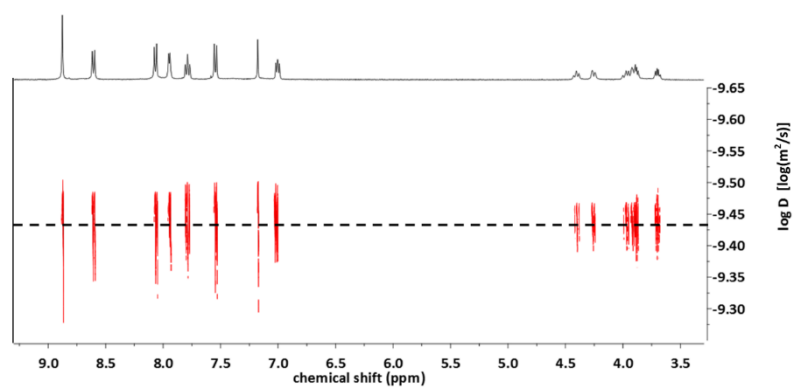

Fig. S5 DOSY spectrum of  $[\text{Cd}_6\text{T}_3]$  in  $\text{CD}_3\text{CN}$ .

## 2D NMR spectra of $[\text{Zn}_6\text{T}_3]$

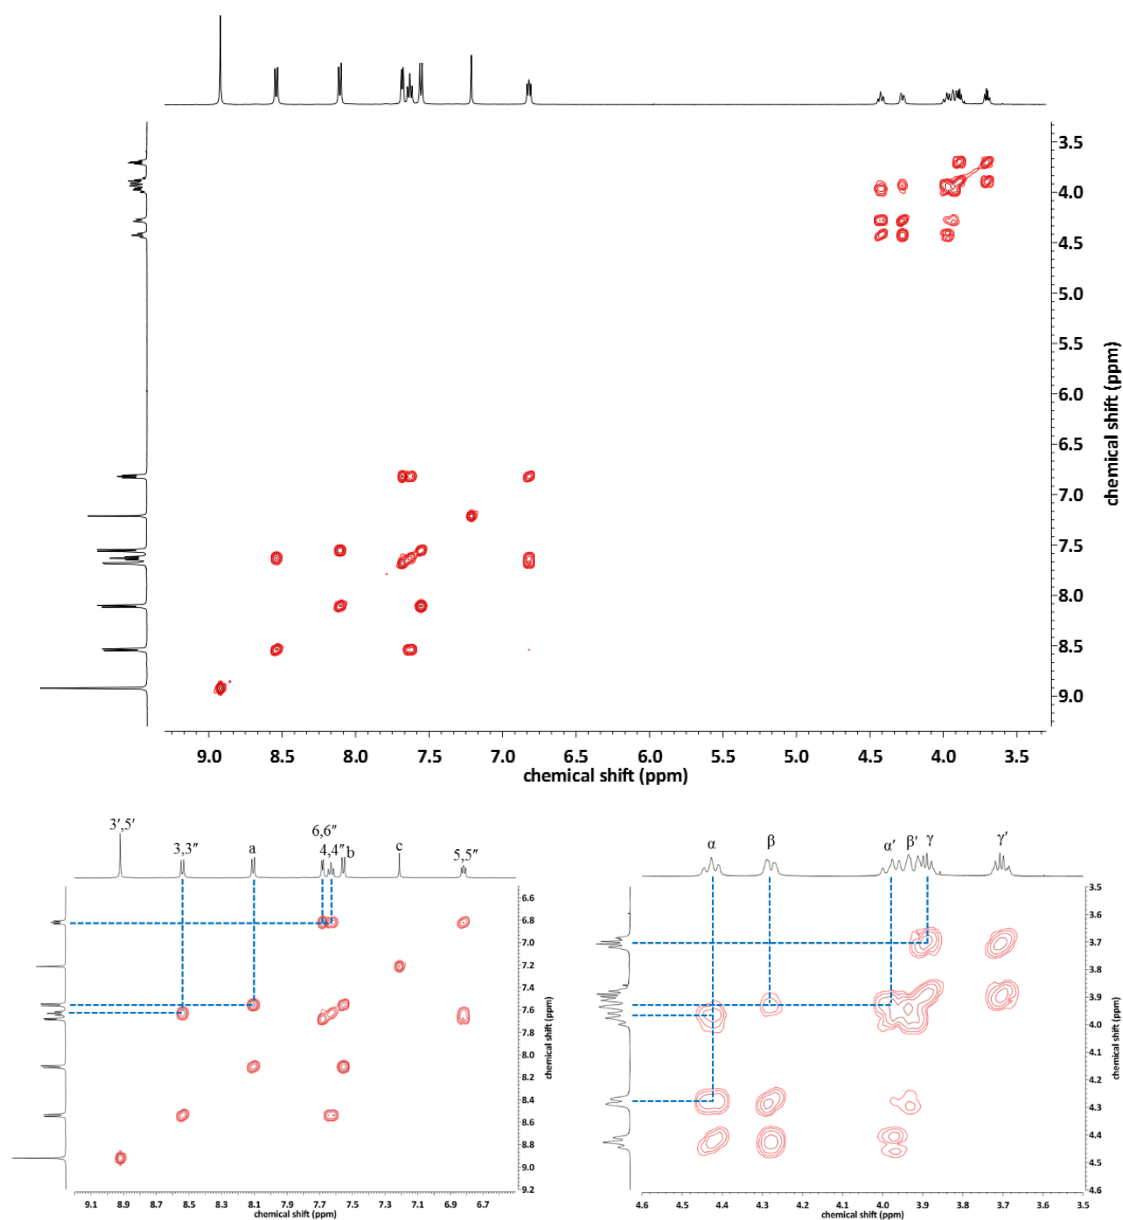

**Fig. S6** COSY spectra of  $[\text{Zn}_6\text{T}_3]$  in  $\text{CD}_3\text{CN}$ .

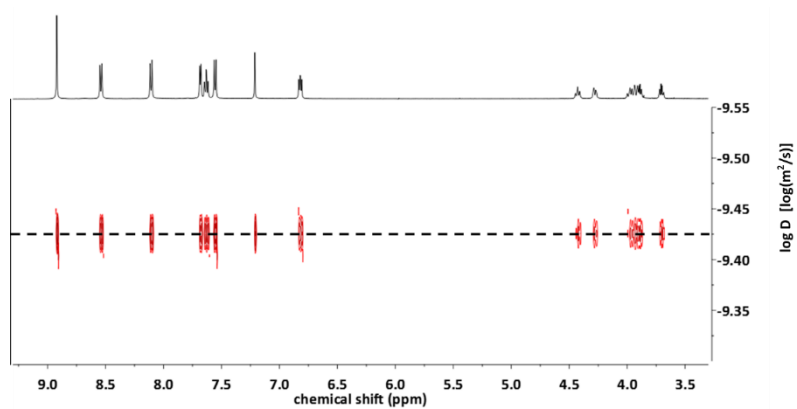

**Fig. S7** DOSY spectrum of  $[\text{Zn}_6\text{T}_3]$  in  $\text{CD}_3\text{CN}$ .



## ESI-MS spectra of $[\text{Cd}_6\text{T}_3]$ and $[\text{Zn}_6\text{T}_3]$

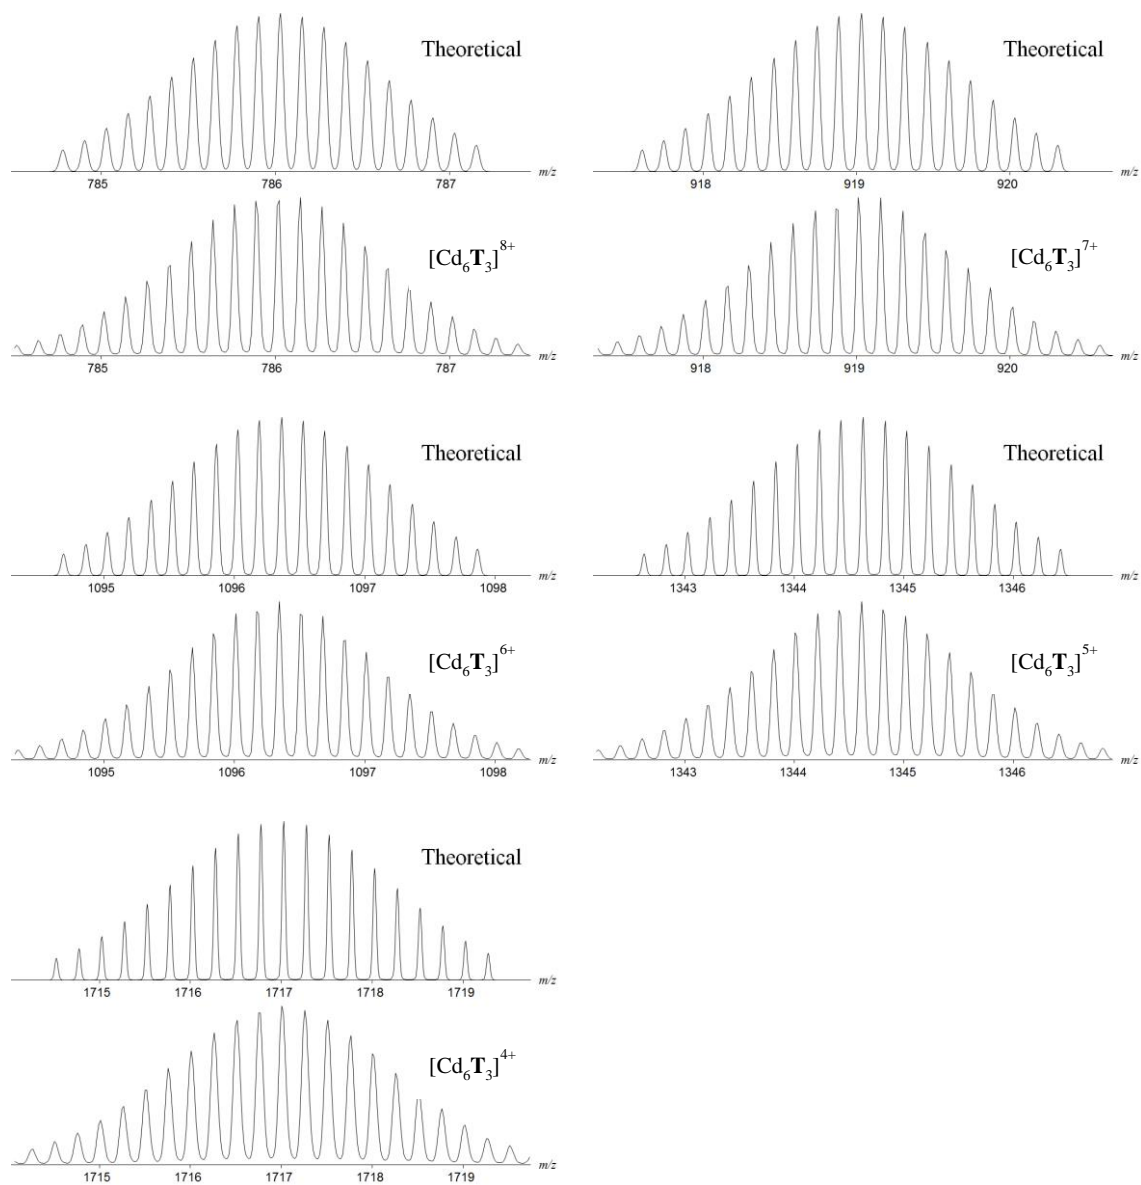

**Fig. S8** Experimental and theoretical ESI-MS isotope patterns of  $[\text{Cd}_6\text{T}_3]$ .

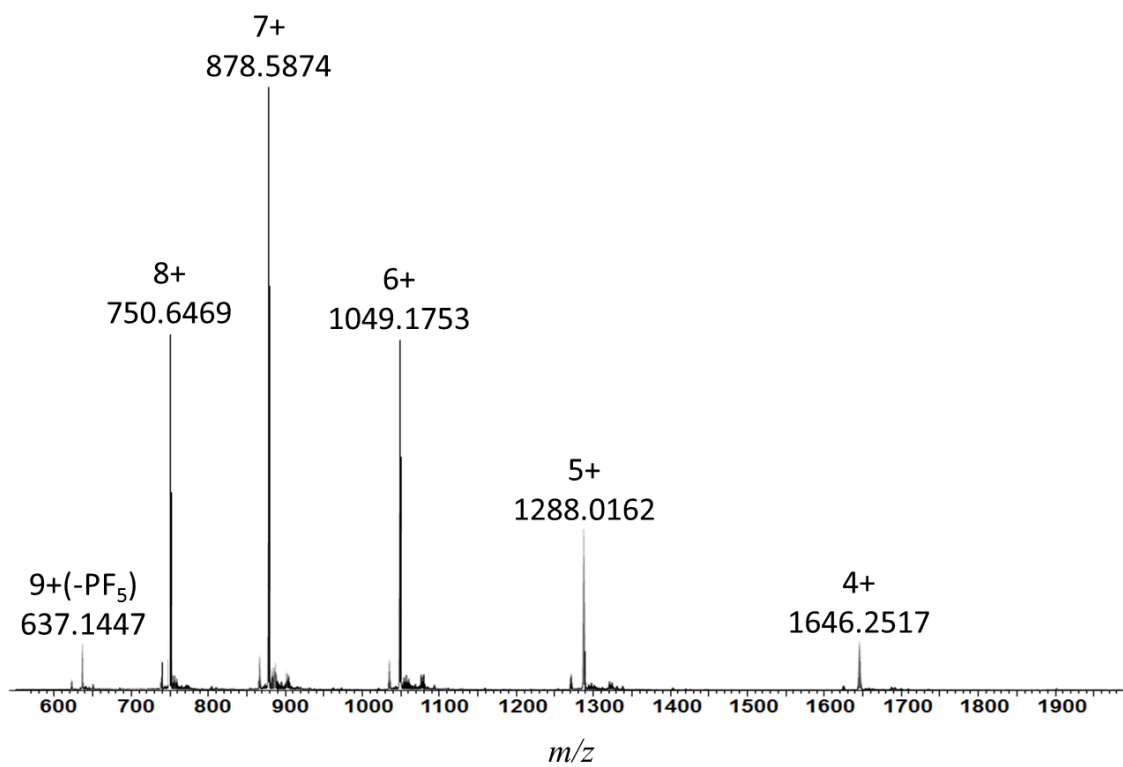

**Fig. S9** ESI-MS spectrum of  $[Zn_6T_3]$ .

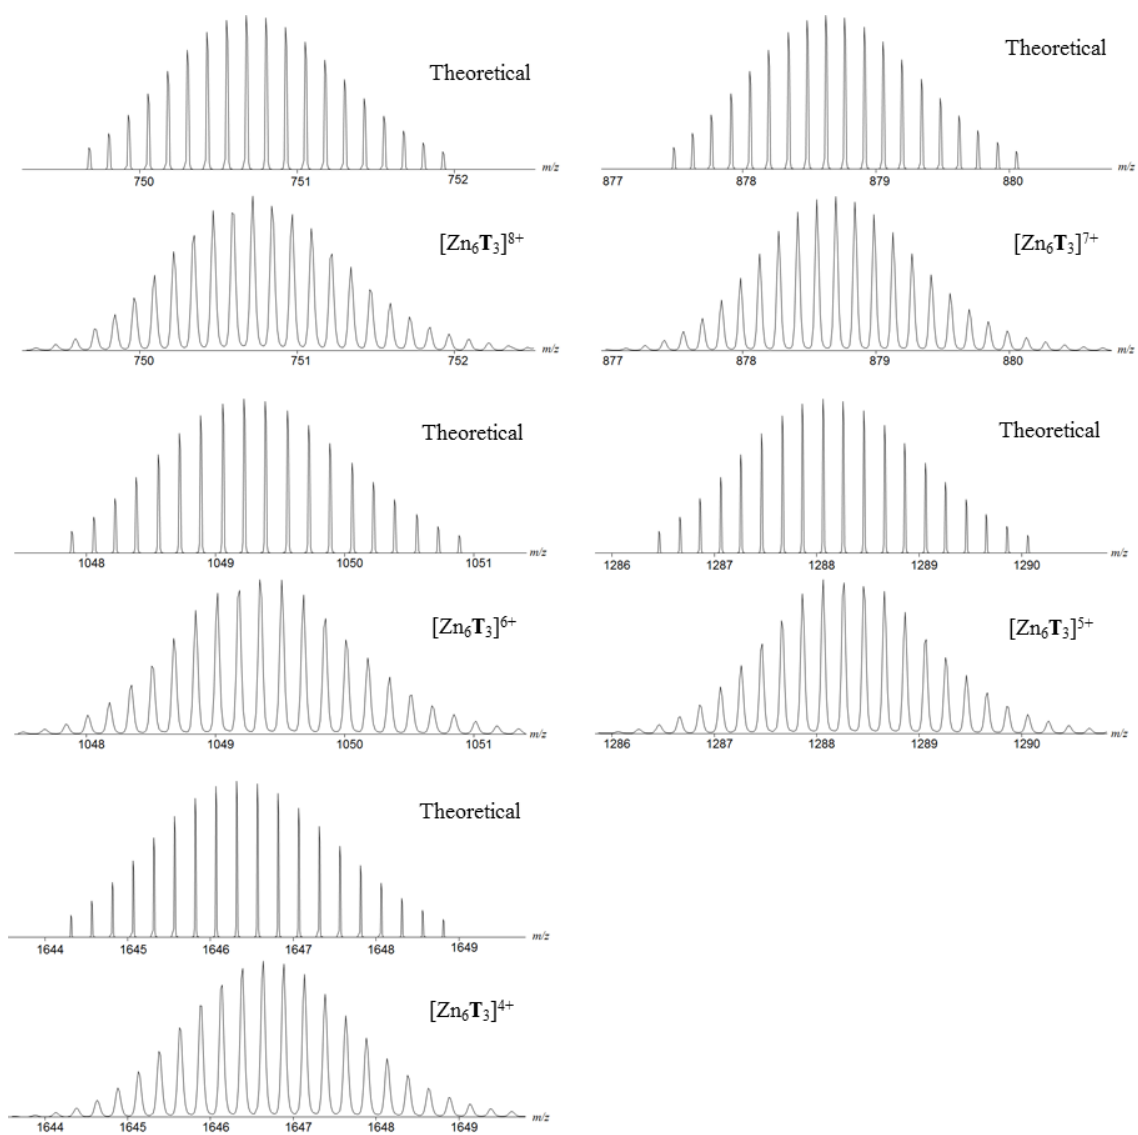

**Fig. S10** Experimental and theoretical ESI-MS isotope patterns of  $[\text{Zn}_6\text{T}_3]$ .

### ESI-TWIM-MS plot of $[\text{Zn}_6\text{T}_3]$

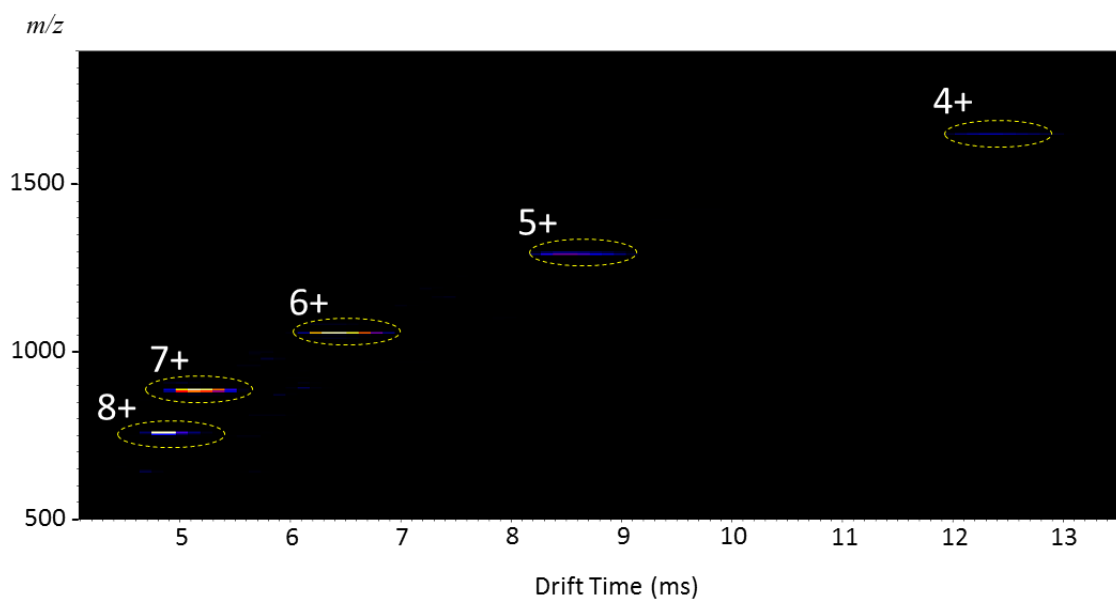

**Fig. S11** ESI-TWIM-MS plot of  $[\text{Zn}_6\text{T}_3]$ .

**Table S1** Experimental and theoretical average collision cross-sections of  $[\text{Cd}_6\text{T}_3]$  and  $[\text{Zn}_6\text{T}_3]$ .

| Drift time (ms)           | Exp. CCS ( $\text{\AA}^2$ ) | Exp. Avg. CCS ( $\text{\AA}^2$ ) | Calcd. Avg. CCS ( $\text{\AA}^2$ ) |
|---------------------------|-----------------------------|----------------------------------|------------------------------------|
| $[\text{Cd}_6\text{T}_3]$ |                             |                                  |                                    |
| 12.46 (4+)                | 829.8                       |                                  |                                    |
| 8.60 (5+)                 | 796.0                       |                                  | 699.1 $\pm$ 4.2 <sup>[a]</sup>     |
| 6.50 (6+)                 | 774.7                       | 803.8 $\pm$ 34.9                 | 829.0 $\pm$ 15.1 <sup>[b]</sup>    |
| 5.29 (7+)                 | 768.8                       |                                  |                                    |
| 5.07 (8+)                 | 849.4                       |                                  |                                    |
| $[\text{Zn}_6\text{T}_3]$ |                             |                                  |                                    |
| 12.13 (4+)                | 814.5                       |                                  |                                    |
| 8.38 (5+)                 | 781.2                       |                                  | 688.1 $\pm$ 4.1 <sup>[a]</sup>     |
| 6.28 (6+)                 | 754.5                       | 776.7 $\pm$ 34.9                 | 814.3 $\pm$ 14.8 <sup>[b]</sup>    |
| 4.96 (7+)                 | 729.7                       |                                  |                                    |
| 4.74 (8+)                 | 803.7                       |                                  |                                    |

<sup>[a]</sup> PA and <sup>[b]</sup> TM values obtained by using MOBICAL.

## Synthesis of **TriG**

[(6-Bromohexyl)oxy](*tert*-butyl)dimethylsilane (**3**) were synthesized according to the literature procedure.<sup>[6]</sup>

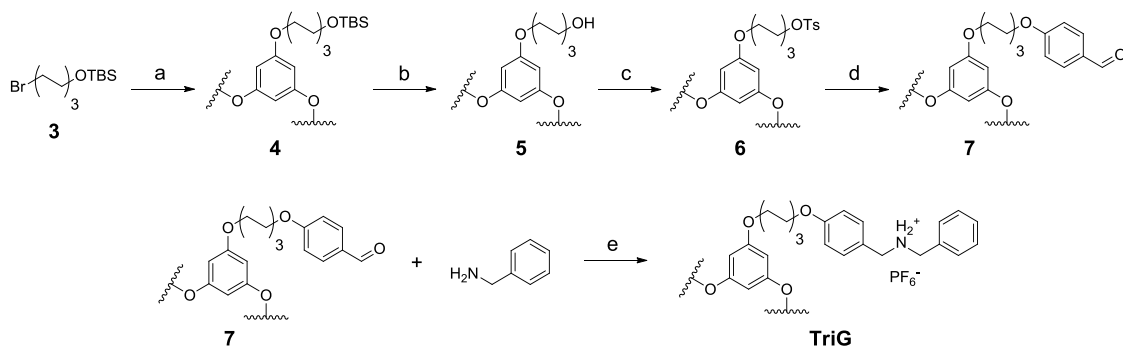

**Scheme S2** Synthesis of **TriG**. *Reagents and conditions*: (a) phloroglucinol,  $K_2CO_3$ , DMF, 90 °C; (b) TBAF, 0 °C; (c) TsCl,  $Et_3N$ , DCM, 0 °C; (d) 4-hydroxybenzaldehyde,  $K_2CO_3$ , MeCN, reflux; (e) 1) toluene, reflux, 2)  $NaBH_4$ , MeOH, 25 °C, 3)  $HCl_{(aq)}$ , 25 °C, 4)  $NH_4PF_6_{(aq)}$ , MeCN, 25 °C.

**Compound 4**. To a stirred solution of **3** (6.7 g, 22.5 mmol), phloroglucinol (0.9 g, 6.8 mmol), and potassium carbonate (4.2 g, 30.7 mmol), anhydrous DMF (20 mL) was added. The mixture was stirred at 90 °C for 12 h, then poured into  $NH_4Cl_{(aq)}$ , and extracted with ethyl acetate. The combined organic layer was dried over anhydrous  $Na_2SO_4$  and the solvent was removed under reduced pressure. The residue was purified by column chromatography ( $SiO_2$ , hexane/EtOAc = 10:1, v/v) to afford **4** as a colorless oil (4.1 g, 5.4 mmol) in 79% yield.  $^1H$  NMR (400 MHz,  $CDCl_3$ ):  $\delta$  (ppm) 6.03 (s, 3H), 3.88 (t,  $J$  = 6.5 Hz, 6H), 3.59 (t,  $J$  = 6.5 Hz, 6H), 1.74 (m, 6H), 1.60–1.29 (m, 18H), 0.87 (s, 27H), and 0.03 (s, 18H).  $^{13}C$  NMR (100 MHz,  $CDCl_3$ ):  $\delta$  (ppm) 160.89, 93.72, 67.88, 63.14, 32.75, 29.25, 25.98, 25.87, 25.60, 18.36, -5.24, and -5.27. ESI-MS: calcd. for  $C_{42}H_{85}O_6Si_3$   $[M+H]^+$ :  $m/z$  = 769.5654; found: 769.5649.

**Compound 5**. To a THF solution (5 mL) of **4** (4.3 g, 5.6 mmol), a THF solution (1 M, 20 mL) of tetrabutylammonium fluoride was added at 0 °C. After the mixture was stirred at 25 °C for 12 h, the solvent was evaporated under reduced pressure and the residue was subjected to column chromatography ( $SiO_2$ , EtOAc) to give **5** as a colorless oil (2.4 g, 5.6 mmol) in 99% yield.  $^1H$  NMR (400 MHz,  $CDCl_3$ ):  $\delta$  (ppm) 6.03 (s, 3H), 3.89 (t,  $J$  = 6.5 Hz, 6H), 3.64 (t,  $J$  = 6.6 Hz, 6H), 1.74 (m, 6H), and 1.65–1.33 (m, 18H).  $^{13}C$  NMR (100 MHz,  $CDCl_3$ ):  $\delta$  (ppm) 160.82, 93.75, 67.79, 62.77, 32.60, 29.12, 25.82, and 25.45. ESI-MS: calcd. for  $C_{24}H_{43}O_6$   $[M+H]^+$ :  $m/z$  = 427.3060; found: 427.3026.

**Compound 6.** To an anhydrous DCM solution (10 mL) of **5** (2.4 g, 5.6 mmol) and *p*-toluenesulfonyl chloride (4.8 g, 25.2 mmol), triethylamine (4.8 mL, 33.6 mmol) was added at 0 °C. After the mixture was stirred at 25 °C for 12 h, the mixture was poured into H<sub>2</sub>O and extracted with CH<sub>2</sub>Cl<sub>2</sub>. The combined organic layer was dried over anhydrous Na<sub>2</sub>SO<sub>4</sub> and the solvent was removed under reduced pressure. The residue was purified by column chromatography (SiO<sub>2</sub>, hexane/EtOAc = 1:1, v/v) to give **6** as a yellow oil (2.2 g, 2.5 mmol) in 44% yield. <sup>1</sup>H NMR (400 MHz, CDCl<sub>3</sub>): δ (ppm) 7.77 (d, *J* = 7.8 Hz, 6H), 7.32 (d, *J* = 7.9 Hz, 6H), 5.99 (s, 3H), 4.01 (t, *J* = 6.4 Hz, 6H), 3.84 (t, *J* = 6.4 Hz, 6H), 2.42 (s, 9H), 1.66 (m, 12H), and 1.37 (s, 12H). <sup>13</sup>C NMR (100 MHz, CDCl<sub>3</sub>): δ (ppm) 160.77, 144.65, 133.06, 129.78, 127.80, 93.68, 70.45, 67.57, 28.93, 28.70, 25.42, 25.10, and 21.58. ESI-MS: calcd. for C<sub>45</sub>H<sub>60</sub>O<sub>12</sub>NaS<sub>3</sub> [M+Na]<sup>+</sup>: *m/z* = 911.3145; found: 911.3149.

**Compound 7.** To a flask containing **6** (1.4 g, 1.6 mmol), 4-hydroxybenzaldehyde (0.9 g, 7.1 mmol), and potassium carbonate (1.9 g, 14.1 mmol), anhydrous acetonitrile (20 mL) was added. The mixture was refluxed for 36 h, then poured into NH<sub>4</sub>Cl<sub>(aq)</sub>, and extracted with ethyl acetate. The combined organic layer was dried over anhydrous Na<sub>2</sub>SO<sub>4</sub> and the solvent was removed under reduced pressure. The residue was purified by column chromatography (SiO<sub>2</sub>, CH<sub>2</sub>Cl<sub>2</sub>/EtOAc = 20:1, v/v) to afford **7** as a yellow oil (1.1 g, 1.5 mmol) in 94% yield. <sup>1</sup>H NMR (400 MHz, CDCl<sub>3</sub>): δ (ppm) 9.86 (s, 3H), 7.80 (d, *J* = 8.3 Hz, 6H), 6.97 (d, *J* = 8.7 Hz, 6H), 6.04 (s, 3H), 4.03 (t, *J* = 6.4 Hz, 6H), 3.90 (t, *J* = 6.4 Hz, 6H), 1.80 (m, 12H), and 1.61–1.46 (m, 12H). <sup>13</sup>C NMR (100 MHz, CDCl<sub>3</sub>): δ (ppm) 190.73, 164.10, 160.83, 131.92, 129.70, 114.67, 93.70, 68.16, 67.68, 29.08, 28.92, 25.78, and 25.70. ESI-MS: calcd. for C<sub>45</sub>H<sub>54</sub>O<sub>9</sub>Na [M+Na]<sup>+</sup>: *m/z* = 761.3666; found: 761.3645.

**Compound TriG.** To a flask containing **7** (196.4 mg, 0.3 mmol) and benzylamine (85 mg, 0.8 mmol), anhydrous toluene (20 mL) was added. The mixture was refluxed for 12 h. After cooling to room temperature, the solvent was removed under reduced pressure. The residue was dissolved in a mixed solvent (20 mL) of CH<sub>2</sub>Cl<sub>2</sub>/MeOH (1:1, v/v). Subsequently, NaBH<sub>4</sub> (1.0 g, excess) was added into the mixture, which was stirred at 25 °C for 4 h. The reaction mixture was poured into H<sub>2</sub>O and extracted with CH<sub>2</sub>Cl<sub>2</sub>. The combined organic layer was dried over Na<sub>2</sub>SO<sub>4</sub> and the solvent was removed under reduced pressure. The residue suspended in hydrochloric acid (37%, excess) was stirred at room temperature for 0.5 h. The white precipitate was filtered and washed with CH<sub>2</sub>Cl<sub>2</sub> to give the white solid, which was suspended in MeCN (5 mL). Saturated NH<sub>4</sub>PF<sub>6(aq)</sub> was added into the suspension until the solid was totally dissolved. The solution was concentrated *in vacuo* and the precipitate was filtered and washed with H<sub>2</sub>O to give **TriG** as a white solid (20.2 mg, 14.0 μmol) in 5% yield. <sup>1</sup>H NMR (400 MHz, CD<sub>3</sub>CN): δ (ppm)

7.45 (s, 15H), 7.37 (d,  $J = 8.7$  Hz, 6H), 6.95 (d,  $J = 8.7$  Hz, 6H), 6.04 (s, 3H), 4.18 (s, 6H), 4.14 (s, 6H), 4.00 (t,  $J = 6.5$  Hz, 6H), 3.92 (t,  $J = 6.5$  Hz, 6H), 1.76 (m, 12H), and 1.50 (m, 12H).  $^{13}\text{C}$  NMR (100 MHz,  $\text{CD}_3\text{CN}$ ):  $\delta$  (ppm) 161.94, 160.98, 132.66, 131.76, 130.95, 130.49, 129.93, 123.30, 115.66, 94.56, 68.79, 68.64, 52.08, 51.95, 29.78, 29.72, 26.40, and 26.35. ESI-MS ( $m/z$ ): 1304.7002  $[\text{M-PF}_6]^+$  (calcd.  $m/z = 1304.5643$ ), 1158.6903  $[\text{M-H-2PF}_6]^+$  (calcd.  $m/z = 1158.5924$ ), and 1012.6776  $[\text{M-2H-3PF}_6]^+$  (calcd.  $m/z = 1012.6204$ ).

$^1\text{H}$  and  $^{13}\text{C}$  NMR spectra of compounds **4**, **5**, **6**, **7**, and **TriG**

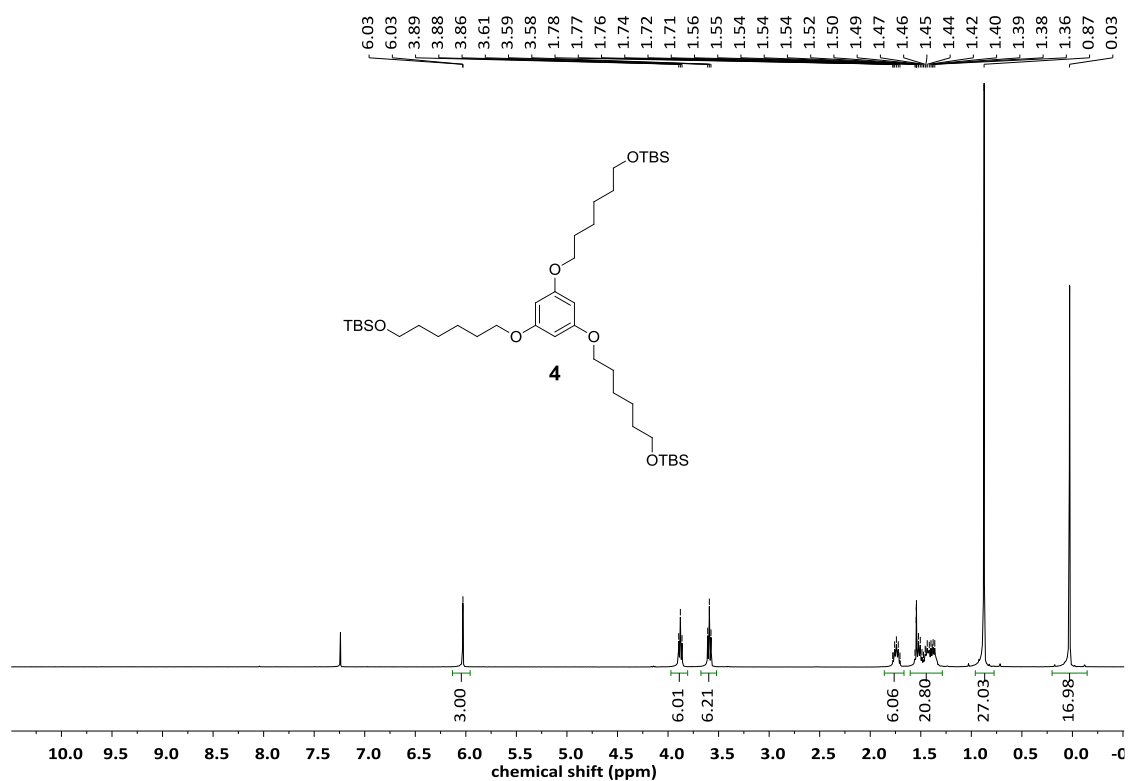

**Fig. S12**  $^1\text{H}$  NMR spectrum of **4**.

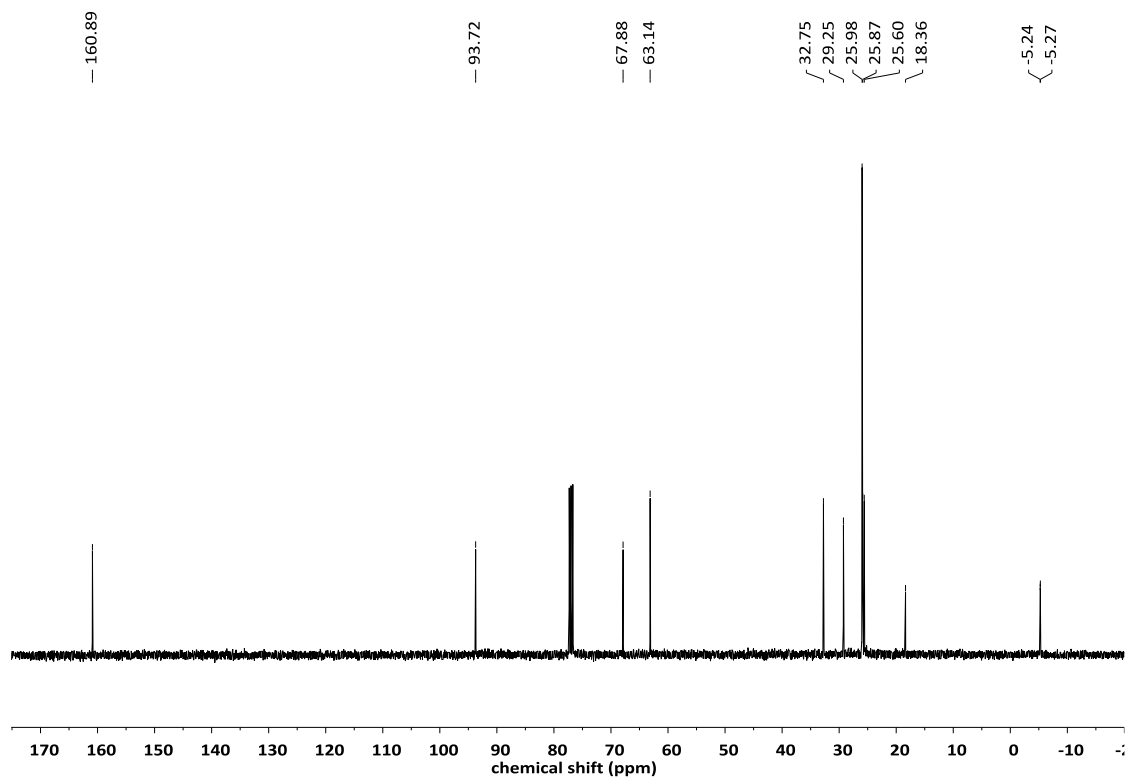

**Fig. S13**  $^{13}\text{C}$  NMR spectrum of **4**.



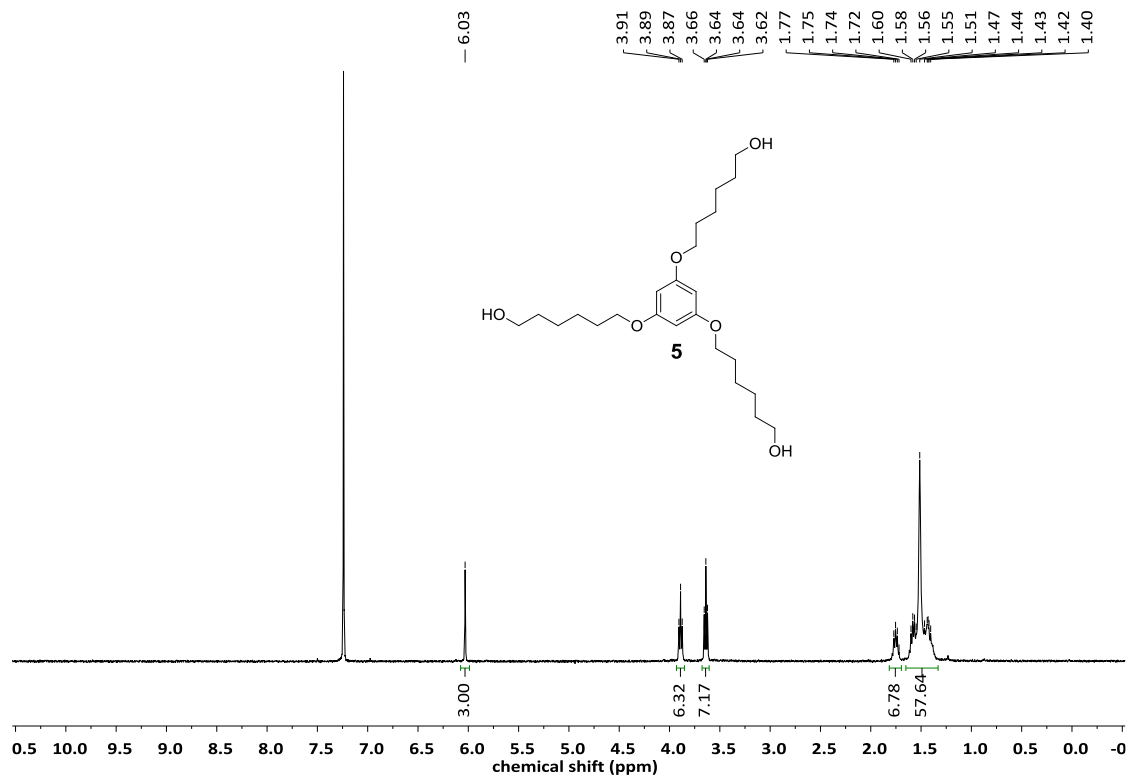

**Fig. S14** <sup>1</sup>H NMR spectrum of **5**.

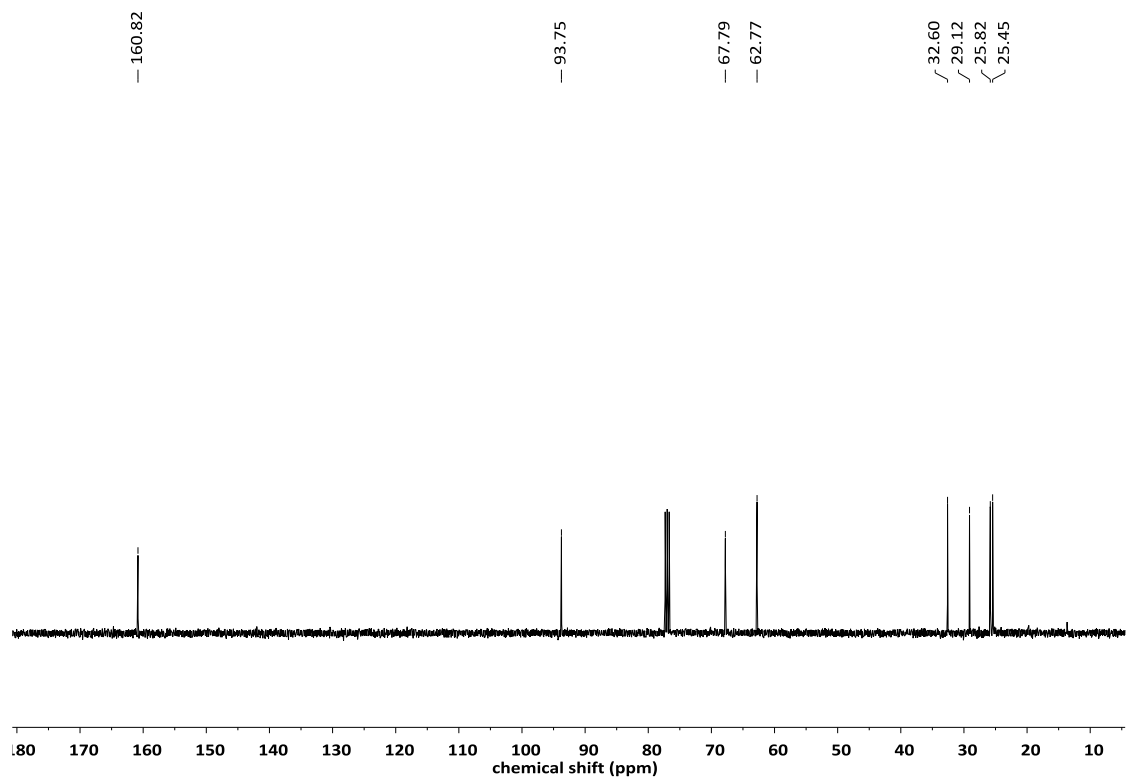

**Fig. S15** <sup>13</sup>C NMR spectrum of **5**.

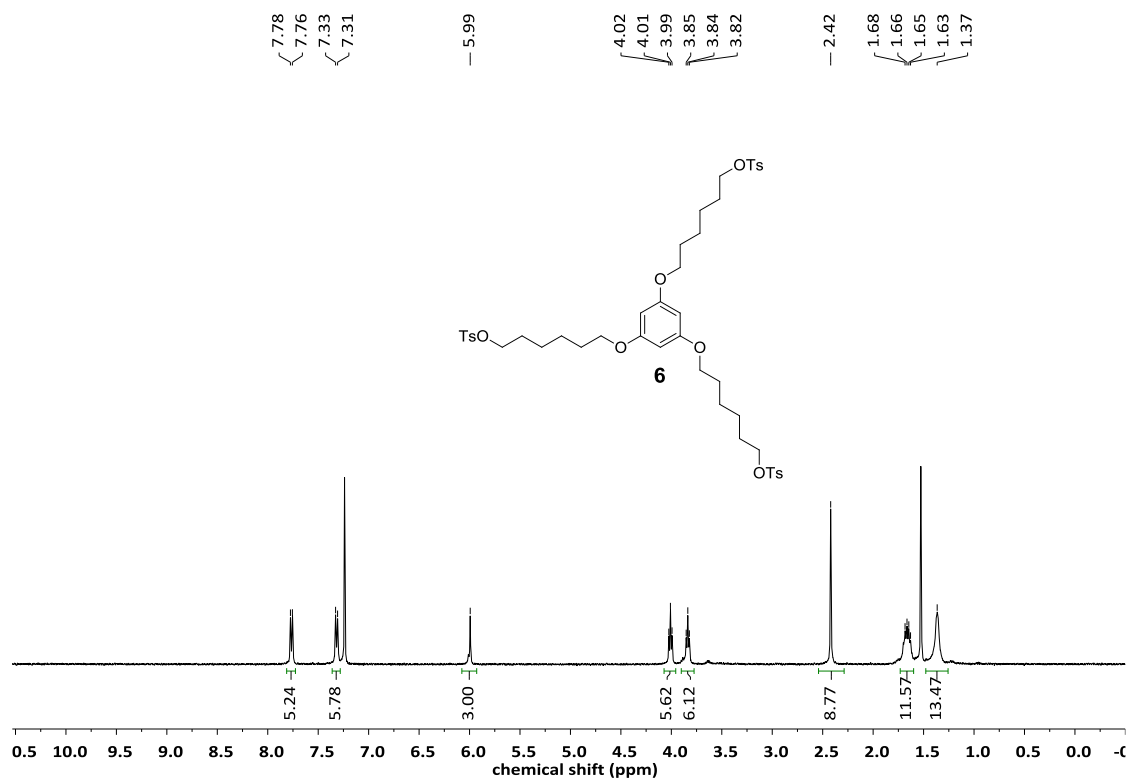

**Fig. S16** <sup>1</sup>H NMR spectrum of **6**.

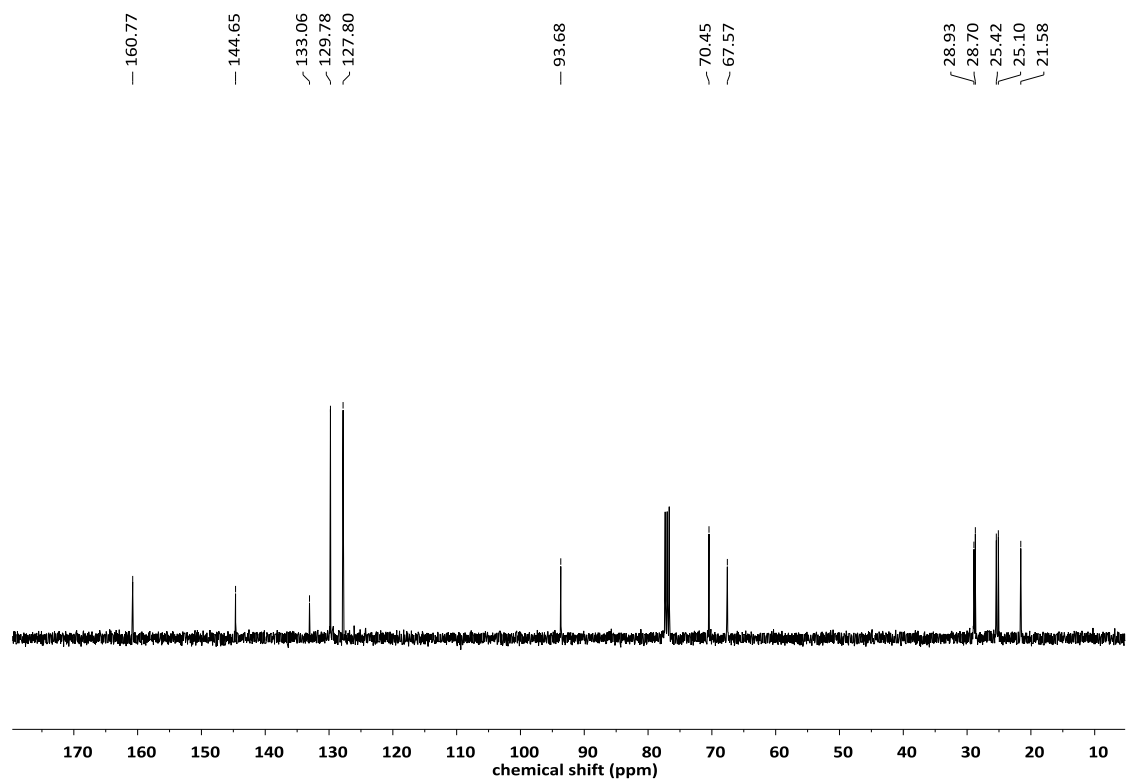

**Fig. S17** <sup>13</sup>C NMR spectrum of **6**.



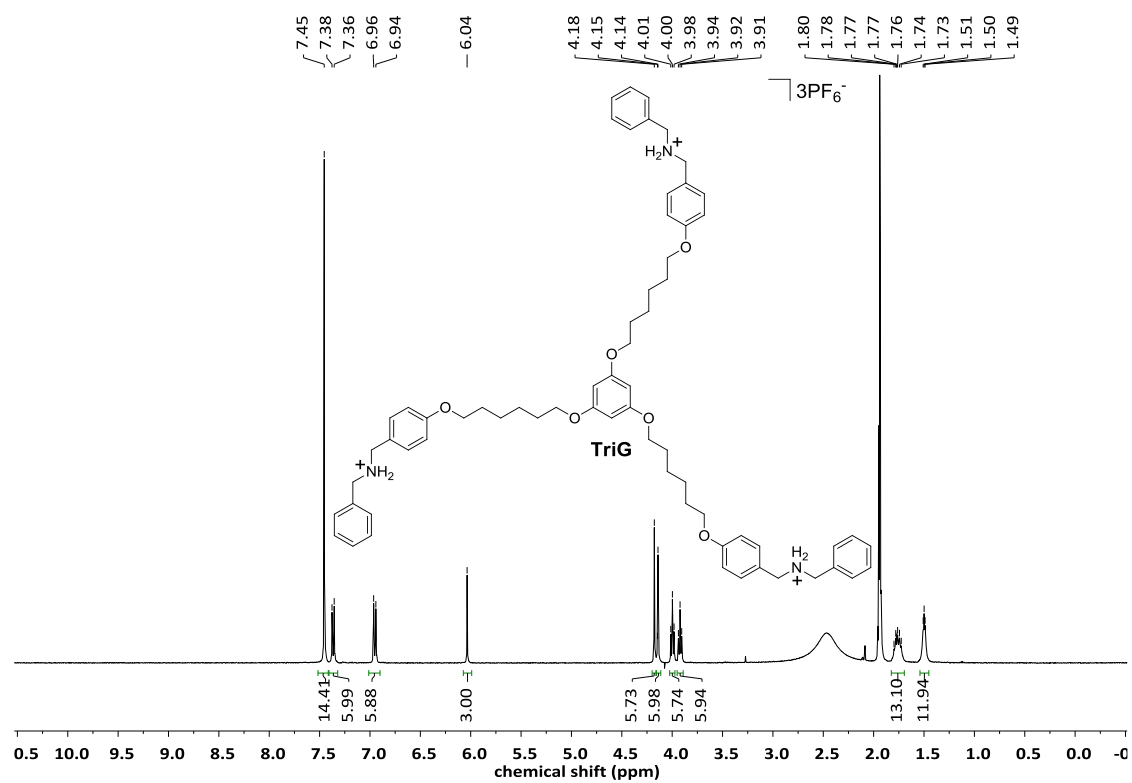

Fig. S20 <sup>1</sup>H NMR spectrum of TriG.

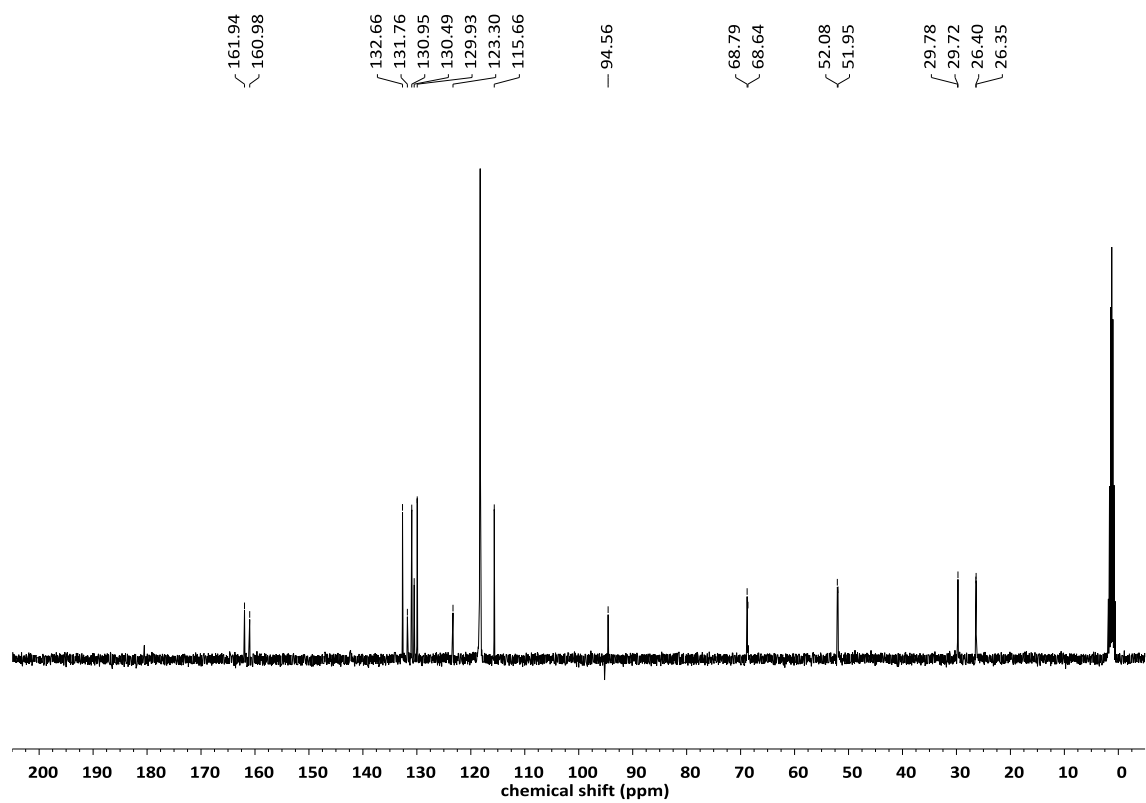

Fig. S21 <sup>13</sup>C NMR spectrum of TriG.

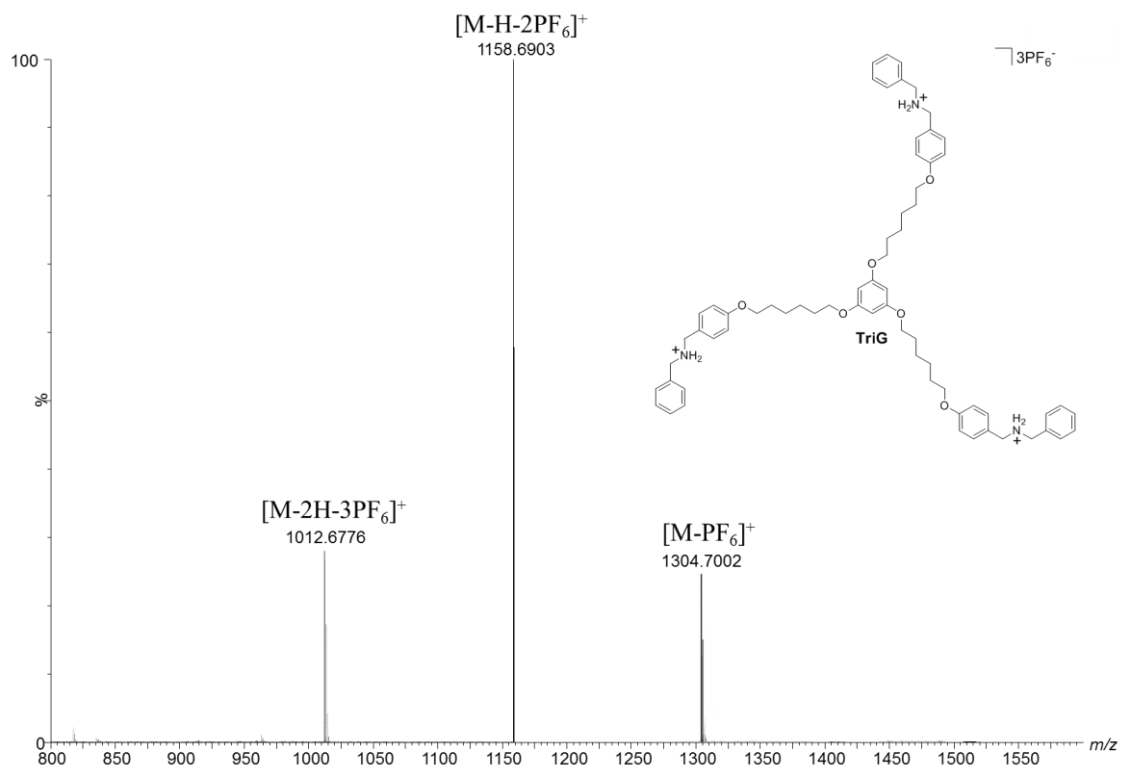

**Fig. S22** ESI-MS spectrum of **TriG**.

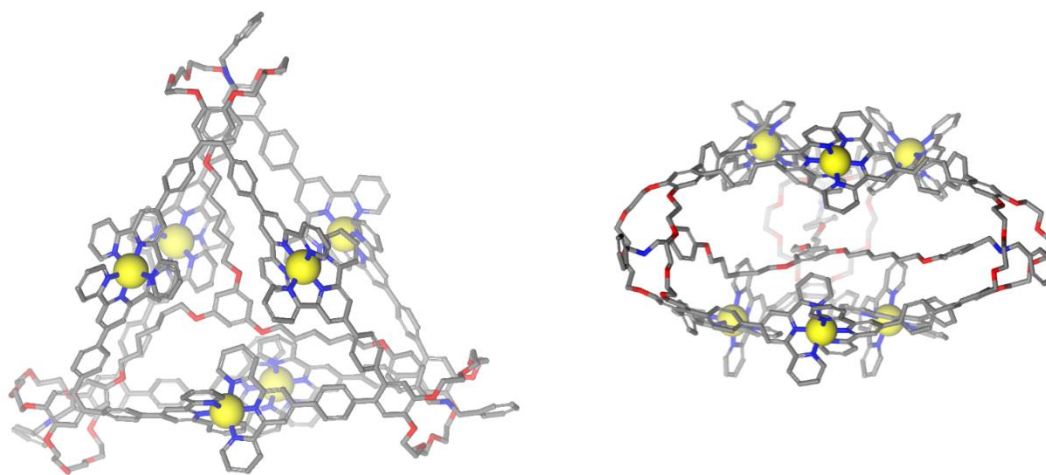

**Fig. S23** Energy-minimized structures of  $[Cd_6T_3] \supset TriG$ .

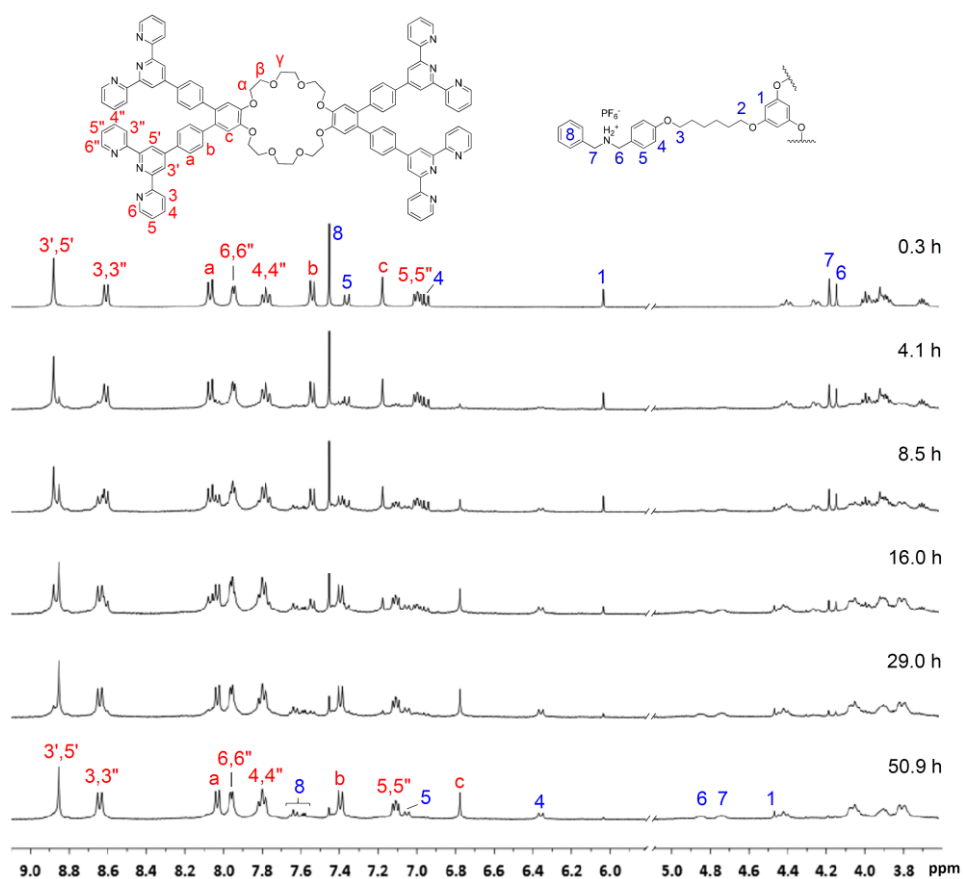

**Fig. S24** Time-dependent  $^1\text{H}$  NMR spectra of a mixture of  $[\text{Cd}_6\text{T}_3]$  (0.8 mM) and **TriG** in a molar ratio of 1:1 at 25 °C.

### 2D NMR spectra of $[\text{Cd}_6\text{T}_3]\supset\text{TriG}$

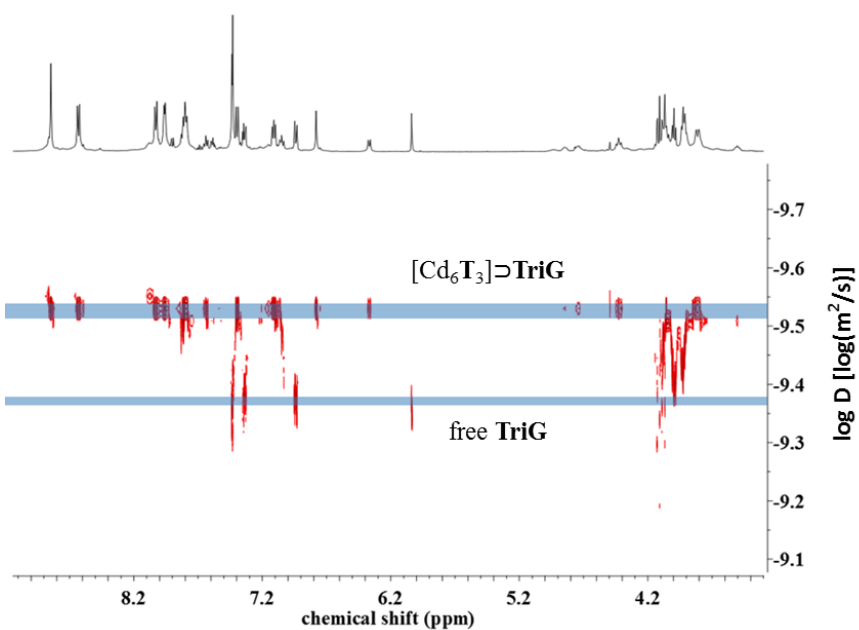

**Fig. S25** DOSY spectrum of  $[\text{Cd}_6\text{T}_3]\supset\text{TriG}$  with excess **TriG** in  $\text{CD}_3\text{CN}$ .

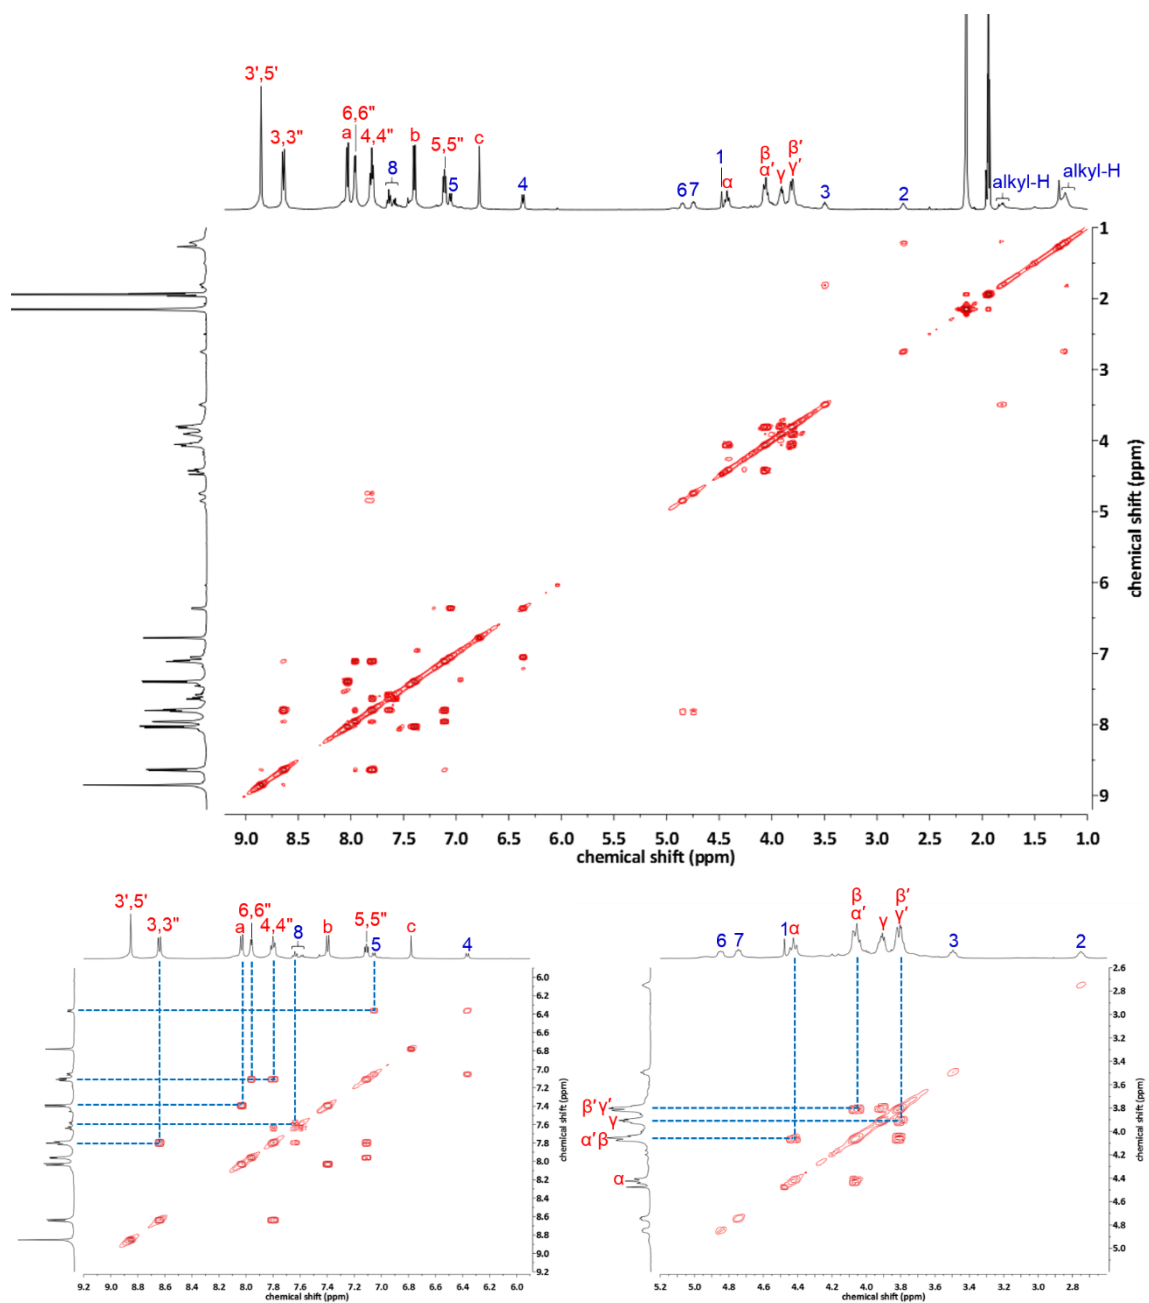

Fig. S26 COSY spectra of  $[Cd_6T_3] \equiv TriG$ .

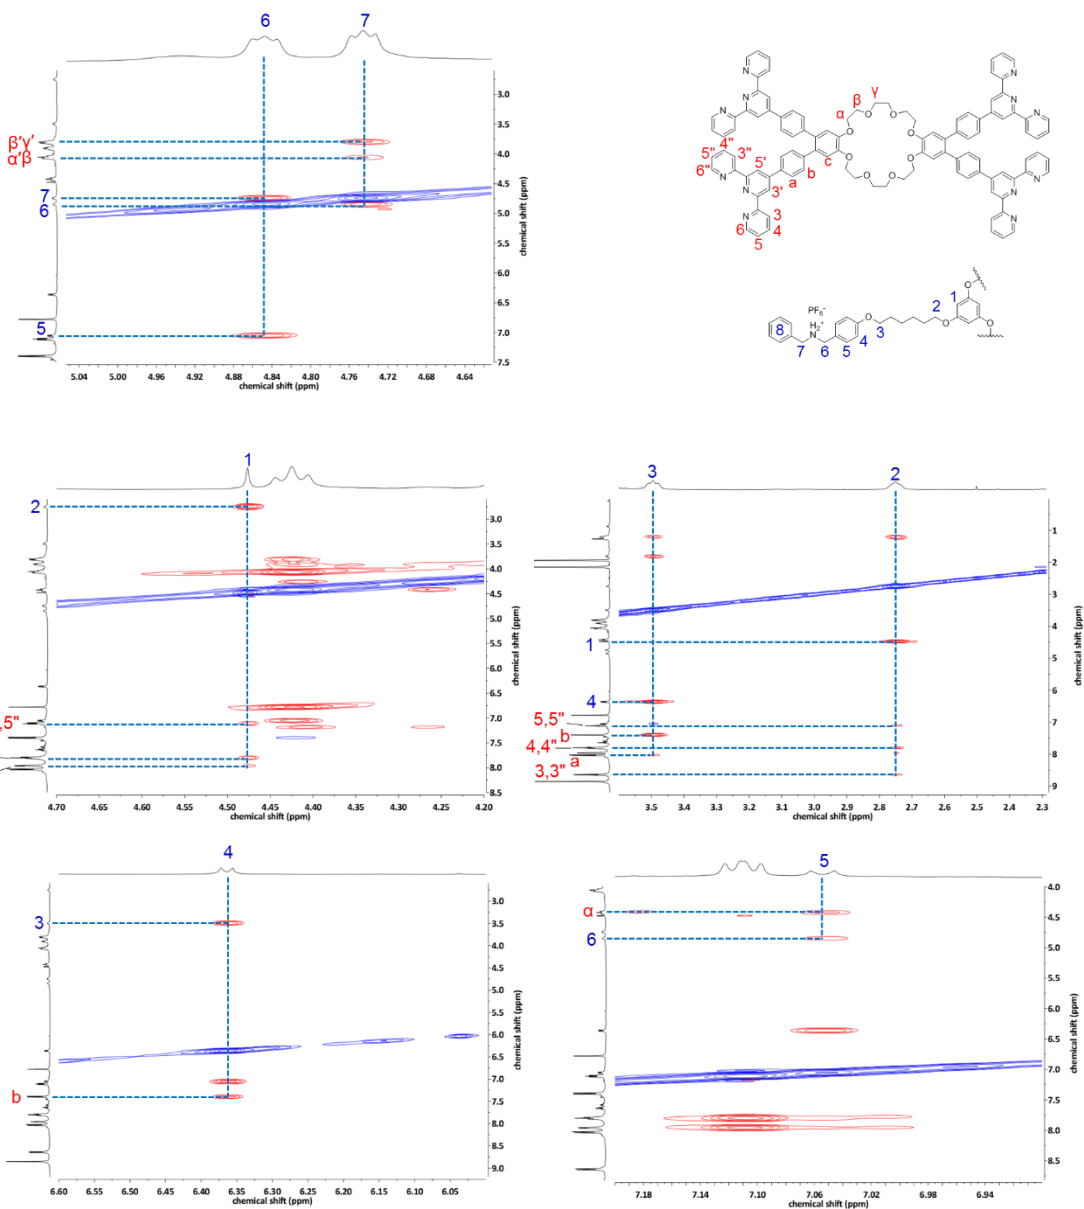

**Fig. S27** ROESY spectra of [Cd<sub>6</sub>T<sub>3</sub>]·TriG in CD<sub>3</sub>CN.



## ESI-MS spectra of $[\text{Cd}_6\text{T}_3]\triangleright\text{TriG}$

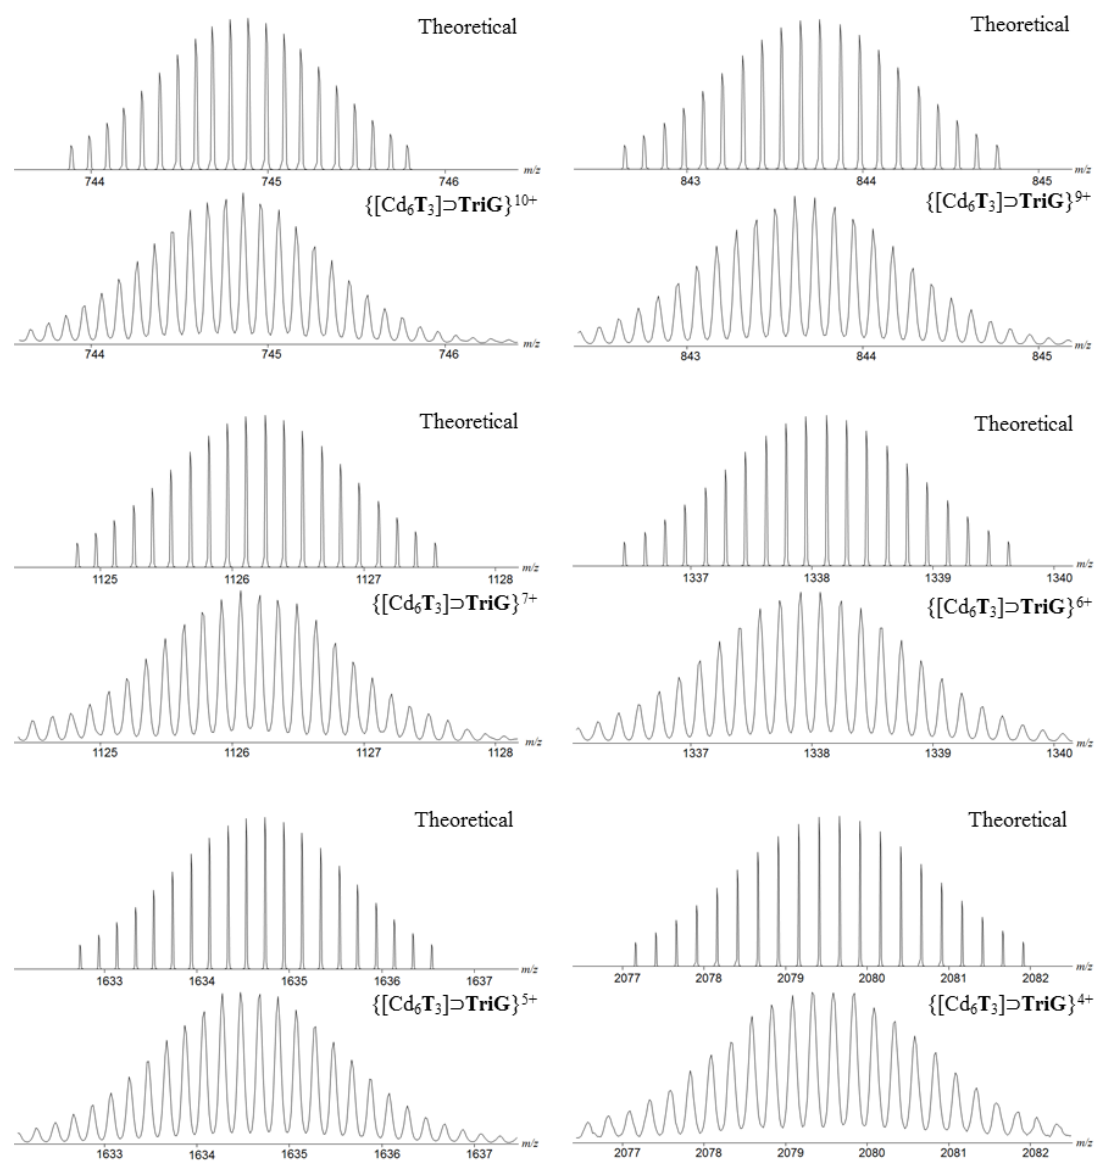

**Fig. S28** Experimental and theoretical ESI-MS isotope patterns of  $[\text{Cd}_6\text{T}_3]\triangleright\text{TriG}$ .

## Binding constant of $[\text{Cd}_6\text{T}_3]\supset\text{TriG}$

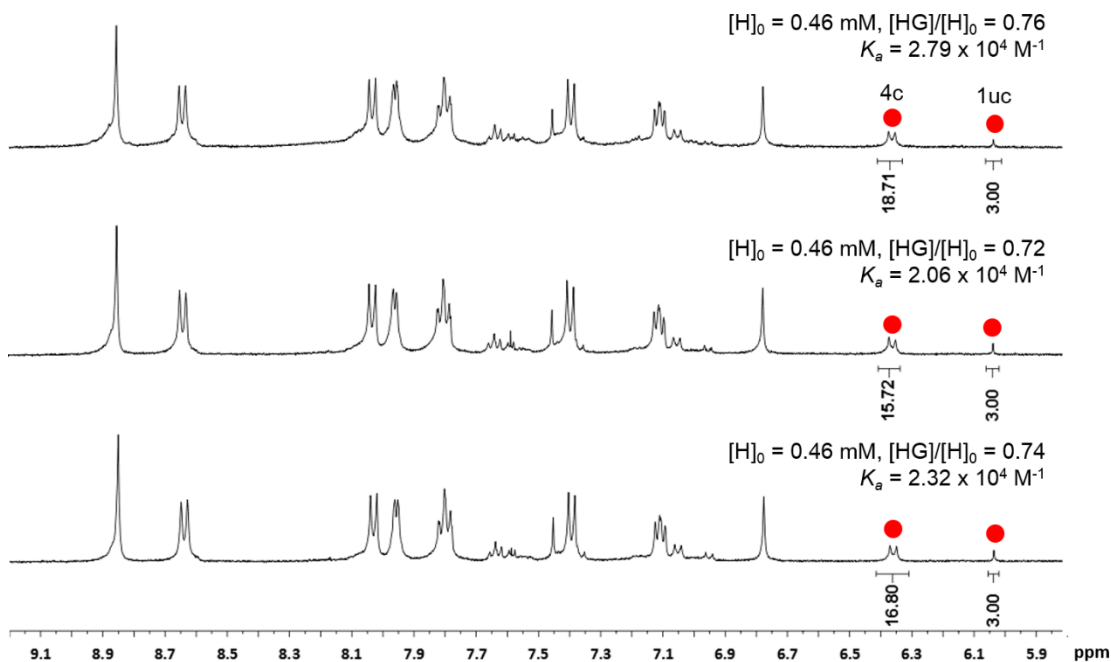

**Fig. S29**  $^1\text{H}$  NMR spectra of the mixture of  $[\text{Cd}_6\text{T}_3]$  (H) and **TriG** (G) at equilibrium in  $\text{CD}_3\text{CN}$  at  $25^\circ\text{C}$ . The experiment was repeated three times, and “c” and “uc” denote the complexed and uncomplexed peaks of **TriG**, respectively.

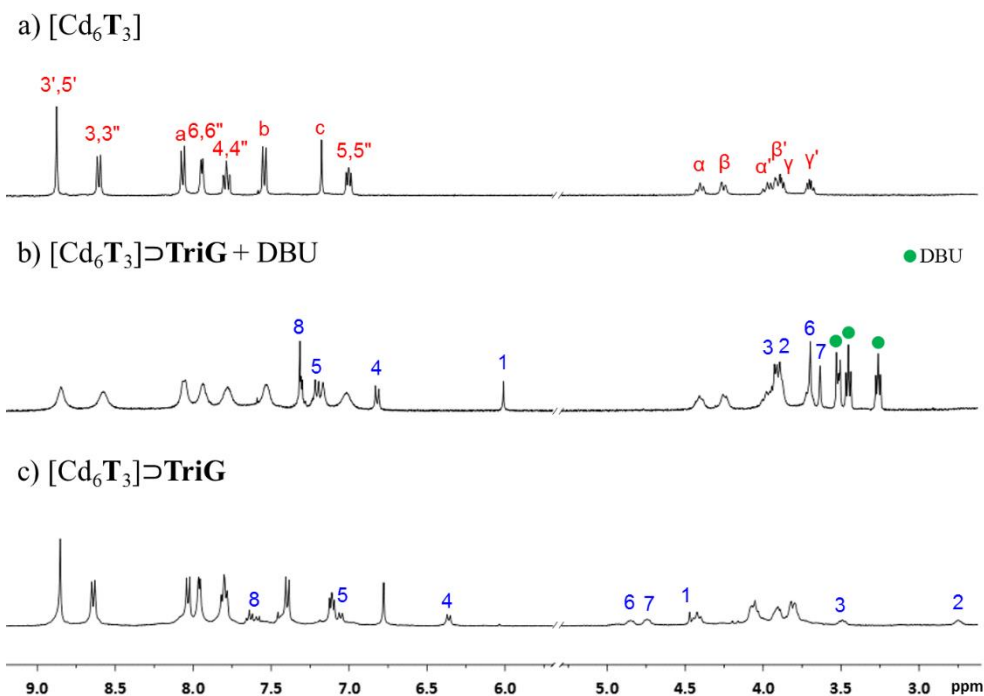

**Fig. S30**  $^1\text{H}$  NMR spectra of a)  $[\text{Cd}_6\text{T}_3]$ , b)  $[\text{Cd}_6\text{T}_3]\supset\text{TriG} + \text{DBU}$ , and c)  $[\text{Cd}_6\text{T}_3]\supset\text{TriG}$ .

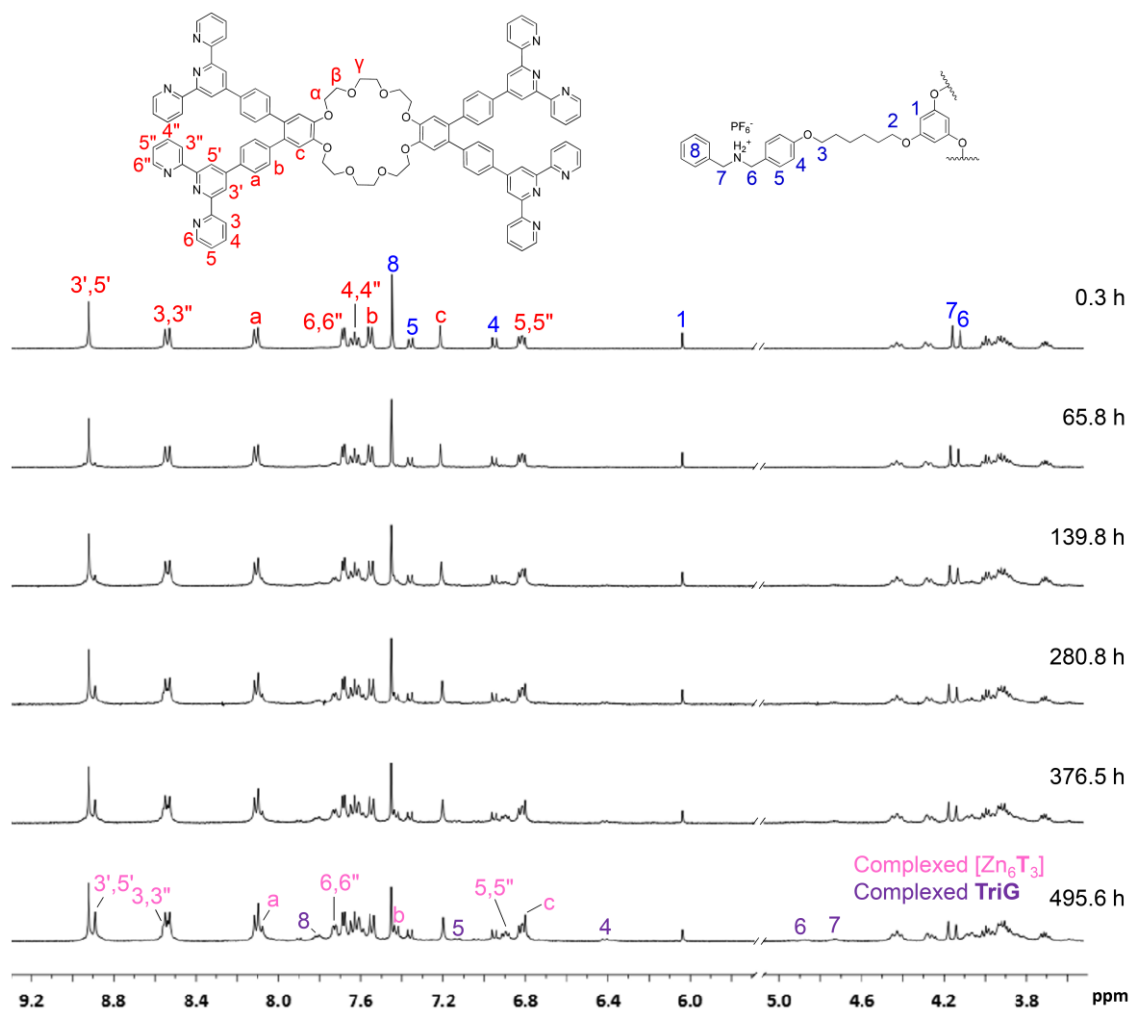

**Fig. S31** Time-dependent  $^1\text{H}$  NMR spectra of a mixture of  $[\text{Zn}_6\text{T}_3]$  (0.8 mM) and **TriG** in a molar ratio of 1:1 at 25 °C.

## Synthesis and characterization of $[\text{Zn}_6\text{T}_3]\text{TriG}$

**$[\text{Zn}_6\text{T}_3]\text{TriG}$ .** To a flask containing  $[\text{Zn}_6\text{T}_3]$  (4.0 mg, 0.6  $\mu\text{mol}$ ), an MeCN solution (0.7 mL) of **TriG** (2.5 mg, 1.7  $\mu\text{mol}$ ) was added. The mixture was refluxed for 48 h, cooled to room temperature, and dried *in vacuo*. The residue was washed with MeOH several times, and then dried *in vacuo* to give  $[\text{Zn}_6\text{T}_3]\text{TriG}$  (4.3 mg, 0.5  $\mu\text{mol}$ ) in 89% yield.  $^1\text{H}$  NMR (400 MHz,  $\text{CD}_3\text{CN}$ ):  $\delta$  (ppm) 8.89 (s, 24H), 8.56 (d,  $J = 8.2$  Hz, 24H), 8.10 (d,  $J = 8.4$  Hz, 24H), 7.82 (d,  $J = 6.7$  Hz, 6H), 7.73 (d,  $J = 4.2$  Hz, 24H), 7.68–7.65 (m, 9H), 7.63 (dt,  $J = 8.0$  and 1.4 Hz, 24H), 7.44 (d,  $J = 8.2$  Hz, 24H), 7.14 (d,  $J = 7.5$  Hz, 6H), 6.92 (dd,  $J = 7.0$  and 5.4 Hz, 24H), 6.80 (s, 12H), 6.42 (d,  $J = 8.0$  Hz, 6H), 4.90–4.85 (m, 6H), 4.76–4.71 (m, 6H), 4.47 (t,  $J = 9.0$  Hz, 12H), 4.24 (s, 3H), 4.09–4.04 (m, 24H), 3.97–3.81 (m, 36H), 3.62–3.54 (m, 6H), and 2.77–2.68 (m, 6H). ESI-MS ( $m/z$ ): 2008.9843  $[\text{M}-4\text{PF}_6]^{4+}$  (calcd.  $m/z = 2008.9452$ ), 1577.9901  $[\text{M}-5\text{PF}_6]^{5+}$  (calcd.  $m/z = 1578.1633$ ), 1291.0007  $[\text{M}-6\text{PF}_6]^{6+}$  (calcd.  $m/z = 1290.9753$ ), 1085.8601  $[\text{M}-7\text{PF}_6]^{7+}$  (calcd.  $m/z = 1085.8412$ ), 931.8813  $[\text{M}-8\text{PF}_6]^{8+}$  (calcd.  $m/z = 931.9905$ ), 812.3367  $[\text{M}-9\text{PF}_6]^{9+}$  (calcd.  $m/z = 812.3289$ ), and 716.6113  $[\text{M}-10\text{PF}_6]^{10+}$  (calcd.  $m/z = 716.5995$ ).

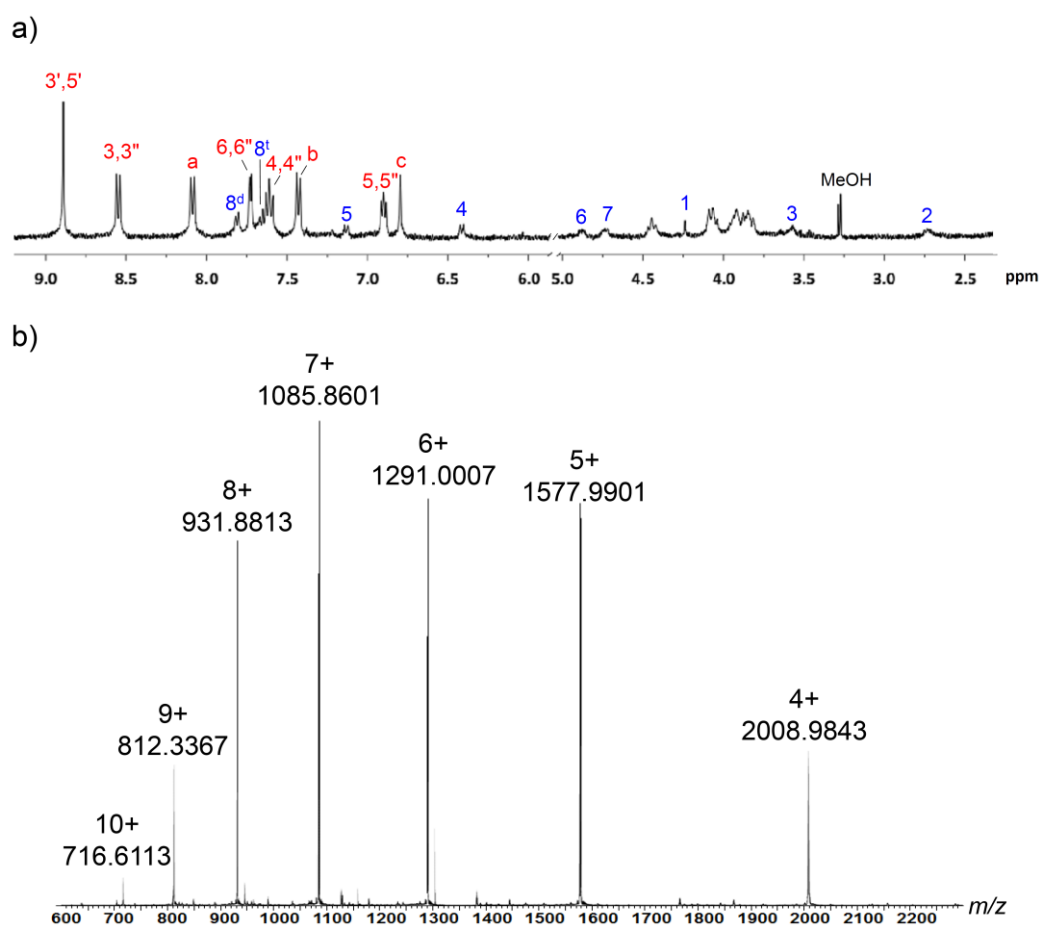

**Fig. S32** a)  $^1\text{H}$  NMR and b) ESI-MS spectra of  $[\text{Zn}_6\text{T}_3]\text{TriG}$ .

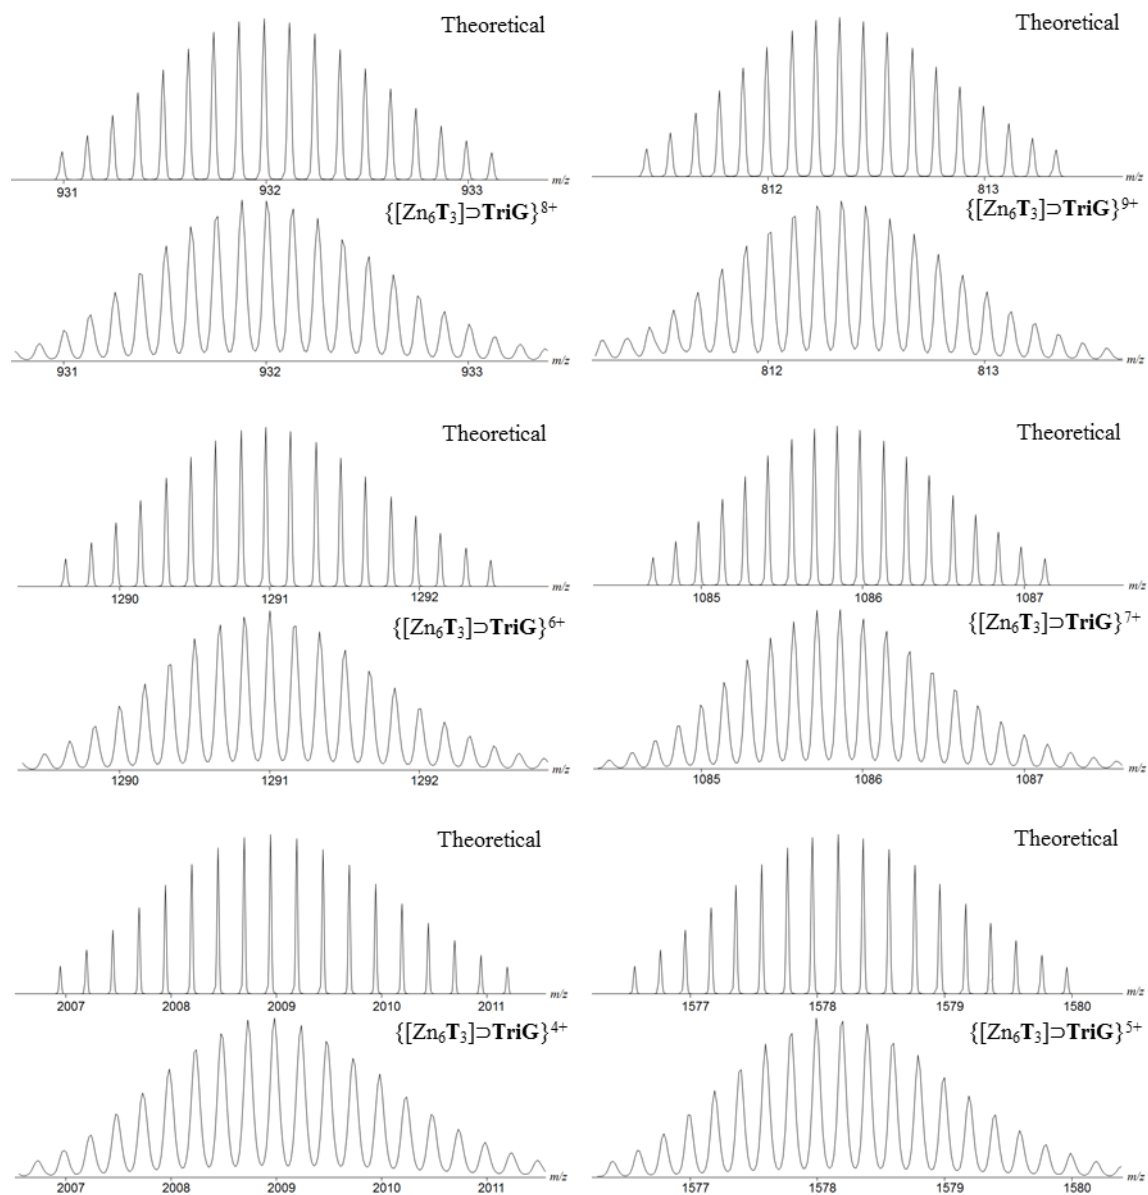

**Fig. S33** Experimental and theoretical ESI-MS isotope patterns of  $[\text{Zn}_6\text{T}_3]\supset\text{TriG}$ .

## Inclusion and transmetalation study

Sample preparation:

**<sup>1</sup>H NMR:** To a sample vial containing [Zn<sub>6</sub>T<sub>3</sub>] (4.0 mg, 0.6 μmol) and [Cd<sub>6</sub>T<sub>3</sub>] (4.2 mg, 0.6 μmol), 0.7 mL CD<sub>3</sub>CN was added. The solution was mixed thoroughly and settled at 25 °C for <sup>1</sup>H NMR measurement at different mixing timeframes. To study the effect of **TriG**, an CD<sub>3</sub>CN solution (0.7 mL) of **TriG** (1.2 mg, 0.8 μmol) was added instead.

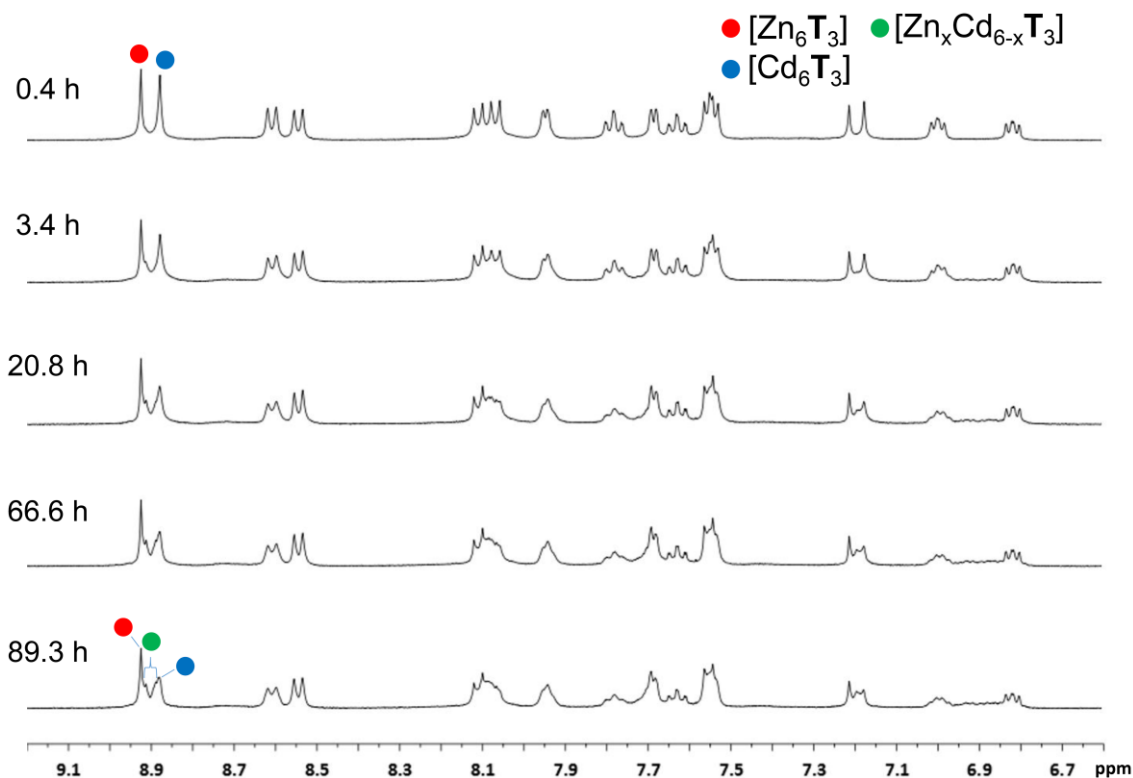

**Fig. S34** Time-dependent <sup>1</sup>H NMR spectra of an equimolar mixture of [Zn<sub>6</sub>T<sub>3</sub>] and [Cd<sub>6</sub>T<sub>3</sub>].

**ESI-MS:** By using a similar procedure, two MeCN mixtures (with and without **TriG**) containing an equimolar amount of [Zn<sub>6</sub>T<sub>3</sub>] and [Cd<sub>6</sub>T<sub>3</sub>] were prepared. 50 μL of the mixture was taken and diluted 5 times with MeCN for ESI-MS measurement at different mixing timeframes.

Data analysis:

**ESI-MS:** The TOF intensities of all [M-6PF<sub>6</sub>]<sup>6+</sup> ions, including [Cd<sub>6</sub>T<sub>3</sub>]<sup>6+</sup>, [ZnCd<sub>5</sub>T<sub>3</sub>]<sup>6+</sup>, [Zn<sub>2</sub>Cd<sub>4</sub>T<sub>3</sub>]<sup>6+</sup>, [Zn<sub>3</sub>Cd<sub>3</sub>T<sub>3</sub>]<sup>6+</sup>, [Zn<sub>4</sub>Cd<sub>2</sub>T<sub>3</sub>]<sup>6+</sup>, [Zn<sub>5</sub>CdT<sub>3</sub>]<sup>6+</sup> and [Zn<sub>6</sub>T<sub>3</sub>]<sup>6+</sup>, were measured for each sampling. It was found that [ZnCd<sub>5</sub>T<sub>3</sub>]<sup>6+</sup> and [Zn<sub>2</sub>Cd<sub>4</sub>T<sub>3</sub>]<sup>6+</sup> were the two primary species in the absence of **TriG** after mixing for 40 h (Fig. S36a), so their relative intensities were normalized against all the 6+ ions. In the presence of **TriG**, the TOF

intensities of the inclusion complexes, including  $[\text{Cd}_6\text{T}_3]^{6+}\supset\text{TriG}$ ,  $[\text{ZnCd}_5\text{T}_3]^{6+}\supset\text{TriG}$ ,  $[\text{Zn}_2\text{Cd}_4\text{T}_3]^{6+}\supset\text{TriG}$ ,  $[\text{Zn}_3\text{Cd}_3\text{T}_3]^{6+}\supset\text{TriG}$ ,  $[\text{Zn}_4\text{Cd}_2\text{T}_3]^{6+}\supset\text{TriG}$ ,  $[\text{Zn}_5\text{Cd}\text{T}_3]^{6+}\supset\text{TriG}$ , and  $[\text{Zn}_6\text{T}_3]^{6+}\supset\text{TriG}$ , were measured and taken into account for normalization. Normalized intensities of the selected 6+ were then plotted against mixing time (Fig. S37).

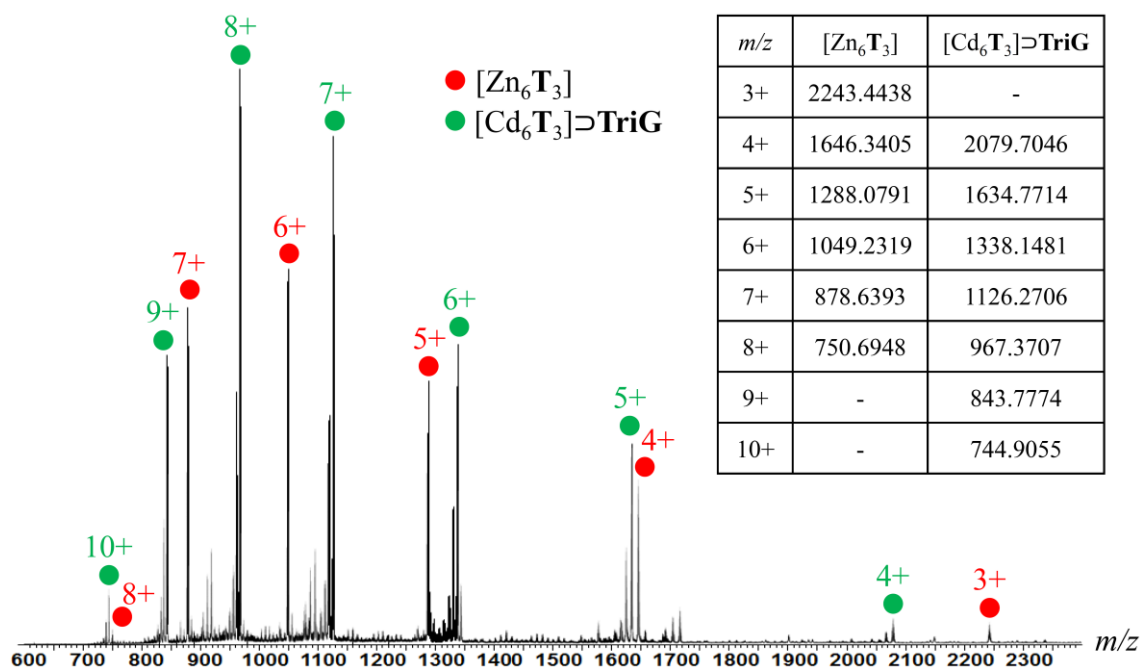

**Fig. S35** ESI-MS spectrum of an equimolar mixture of  $[\text{Zn}_6\text{T}_3]$  and  $[\text{Cd}_6\text{T}_3]$  after mixed with **TriG** for 40 h. The major species are  $[\text{Zn}_6\text{T}_3]$  and  $[\text{Cd}_6\text{T}_3]\supset\text{TriG}$ .

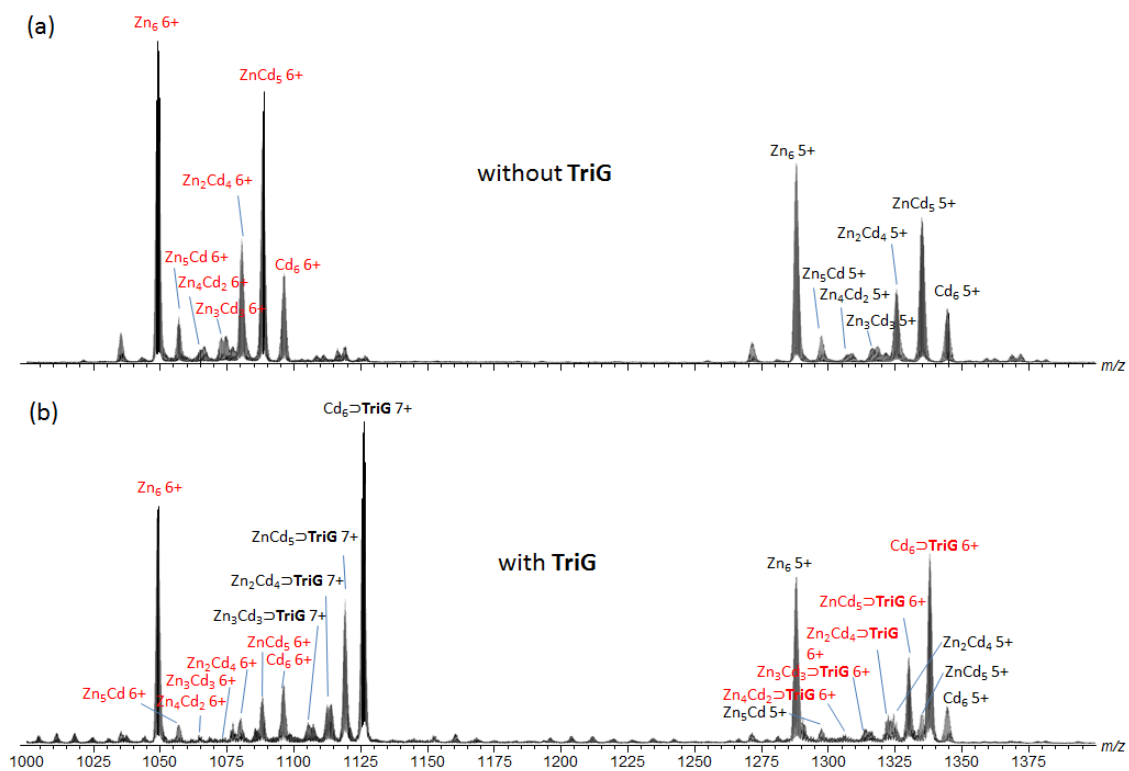

**Fig. S36** Partial ESI-MS spectra of two MeCN mixtures (a) without and (b) with **TriG**, containing  $[\text{Zn}_6\text{T}_3]$  and  $[\text{Cd}_6\text{T}_3]$  (1:1) after mixing for 40 h.



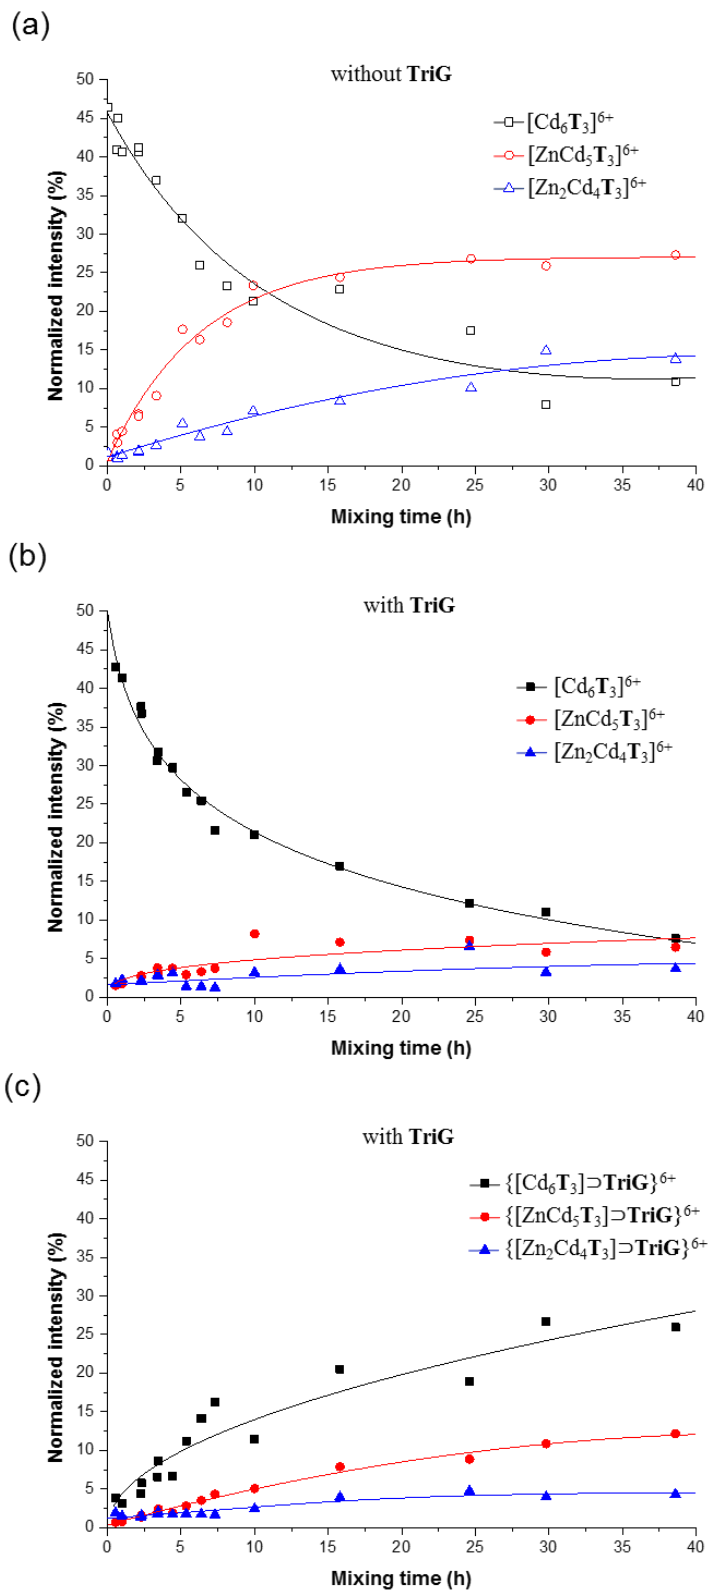

**Fig. S37** ESI-MS trace plots of normalized intensities for the 6+ ions vs. mixing time (a) without and (b-c) with **TriG**.

## Tandem mass spectrometry analysis

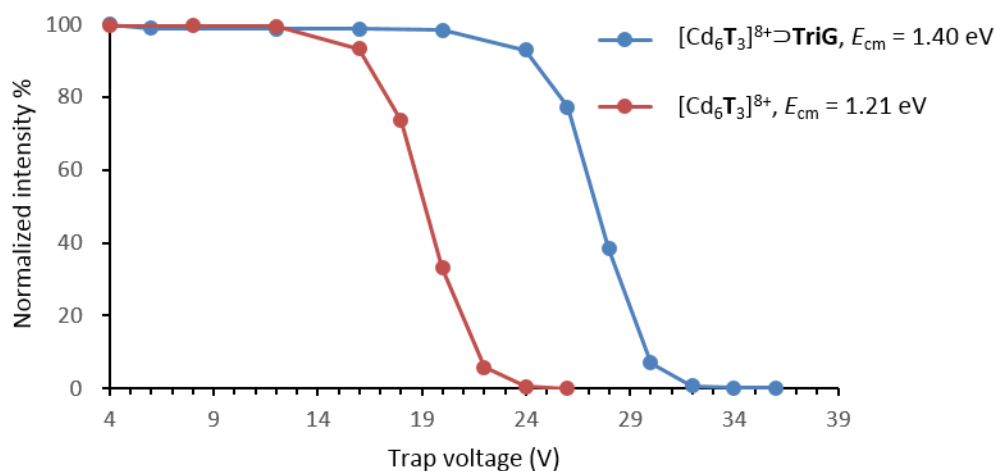

**Fig. S38** Normalized intensities for  $[\text{Cd}_6\text{T}_3]^{8+}$  and  $\{[\text{Cd}_6\text{T}_3] \supset \text{TriG}\}^{8+}$  as a function of trap voltage and their corresponding center-of-mass collision energies ( $E_{\text{cm}}$ ).

## References

- [1] Y.-P. Liang, Y.-J. He, Y.-H. Lee, Y.-T. Chan, *Dalton Trans.*, 2015, **44**, 5139.
- [2] Y.-T. Chan, X. Li, J. Yu, G. A. Carri, C. N. Moorefield, G. R. Newkome, C. Wesdemiotis, *J. Am. Chem. Soc.*, 2011, **133**, 11967.
- [3] (a) A. A. Shvartsburg, M. F. Jarrold, *Chem. Phys. Lett.*, 1996, **261**, 86; (b) M. F. Mesleh, J. M. Hunter, A. A. Shvartsburg, G. C. Schatz, M. F. Jarrold, *J. Phys. Chem.*, 1996, **100**, 16082.
- [4] A. Schultz, Y. Cao, M. Huang, S. Z. Cheng, X. Li, C. N. Moorefield, C. Wesdemiotis, G. R. Newkome, *Dalton Trans.*, 2012, 41, 11573.
- [5] M. Kaller, P. Staffeld, R. Haug, W. Frey, F. Giesselmann, S. Laschat, *Liq. Cryst.*, 2011, **38**, 531.
- [6] M. R. Uehling, A. M. Suess, G. Lalic, *J. Am. Chem. Soc.*, 2015, **137**, 1424.
